# Supplementary material
Source: bioRxiv or medRxiv preprint supplement (https://www.biorxiv.org/highwire/filestream/73346/field_highwire_adjunct_files/0/239863-1.pdf)
Supplement: Supplementary file [file 239863-1.pdf]

# SUPPLEMENT

## POST-ACQUISITION TARGETED SEARCHES (PATS) FOR NOVEL PEPTIDES IN BIG MASS SPECTROMETRY DATA-SETS

Yu Gao<sup>†</sup>, Jiao Ma<sup>♦</sup>, Alan Saghatelian<sup>♦</sup>, John R. Yates III<sup>†</sup>

<sup>†</sup> Department of Molecular Medicine, The Scripps Research Institute, La Jolla CA 92037

<sup>♦</sup> Clayton Foundation Laboratories for Peptide Biology, Salk Institute for Biological Studies, La Jolla CA 92037

---

**Supplementary Figure 1.** Detailed PATS workflow comparing to conventional approach.

**Supplementary Table 1.** Small encoding peptide (SEP) numbering and sequences.

**Supplementary Table 2.** Detected microprotein peptide sequences from human interactome data.

**Supplementary Spectra 1-18.** Spectra of synthetic and PATS detected microprotein peptides

## Supplementary Figure 1

### Supplementary Figure 1

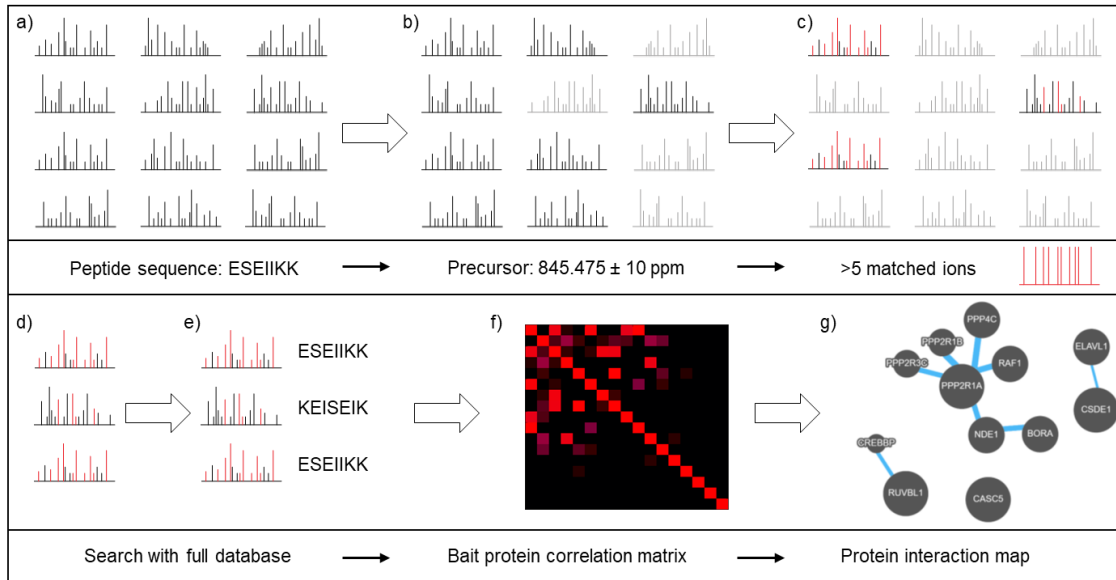

Supplementary Figure 1. PATS workflow comparing to conventional approach. a) High quality MS/MS spectra were selected. b) MS/MS spectra were filtered by precursor mass of target peptide. c) MS/MS spectra were filtered by number of matching y and b ions to the target peptide. d) Filtered MS/MS spectra were combined into single file. e) Filtered MS/MS spectra were searched against database to generate peptide identifications. e) Bait protein correlation matrix was generated based on peptide identification, bait proteins and STRING-DB correlation score. f) Protein interaction network related the target peptide was generated based on correlation matrix.

**Supplementary Table 1.** Small encoding peptide (SEP) numbering and sequences.

| SEP   | Sequence                                                                                                            | Additional Note                                                  |
|-------|---------------------------------------------------------------------------------------------------------------------|------------------------------------------------------------------|
| SEP1  | AEDCASALQPRRQRETL SQKKKKKGLKLLNKITLTPILSTSLYCH<br>STILCFIL                                                          | chr2:73685032-<br>73686486_strand=+ ALMS1-<br>IT1:NR_046762.1    |
| SEP2  | MKVVWGLAAACFLQHHGMPAQFTLPPAPRDETSPADAVCPG<br>LGRDLCGSSRCCLRPPSQPDWKEPSGAALRARAPRGR                                  | chr6:24403092-<br>24425750_strand=+ MRS2:NM<br>_001286265.1      |
| SEP3  | WRAASRRPVSDGTSTLSRHHWRVTSPGSVCGALACPSSTFPR<br>GPGEAGMSWEEAGGLAPHLCCRGQQRKTMWTCHCLVPLCL<br>AQGSRLKGPQVDLETLRVENGGRPA | chr6:36646489-<br>36655106_strand=+ CDKN1A:N<br>M_001220777.1    |
| SEP4  | MNFKNGPIFYPRGSSDIISVPCEFPSPMGRMPLLFI SNKL                                                                           | chr9:5784555-<br>5791478_strand=-<br> ERMP1:XM_005251587.1       |
| SEP5  | MSSMPLICFLILEGLRSWRATPTTPEEV                                                                                        | chr3:42700959-<br>42709057_strand=+ ZBTB47:X<br>M_006713415.1    |
| SEP6  | MKACTTVPPAPGCSMPPTTAGTRRAVPAQGLLQSTPTCMPWT<br>PYLCLCWVWVQGW                                                         | chr1:160061136-<br>160068413_strand=-<br> IGSF8:XM_005245613.1   |
| SEP7  | TKYLCNYLITLVNRWNMNAWKIKL                                                                                            | chr12:115108455-<br>115109381_strand=-<br> TBX3:NM_005996.3      |
| SEP8  | FIQILEDQGLSSFILG                                                                                                    | chr5:53783495-<br>53783605_strand=+ NONANN<br>OT                 |
| SEP9  | IMYALGNENPVTFLNKFLYLHHL                                                                                             | chr14:44572751-<br>44572856_strand=-<br> NONANNOT                |
| SEP10 | MRHLQIALRQL                                                                                                         | chr9:127023982-<br>127024178_strand=+ TBC1D32<br>:XM_005266861.1 |
| SEP11 | ARGDAPGAGPQAGSACRYRGHRQGCGQPQAGQALQGLQ<br>WCRDHVRLPRG                                                               | chr9:124030419-<br>124094730_strand=+ GSN:XM<br>_005251940.1     |
| SEP12 | DWRITRRALTSSQEPFKSSFLCLVEEIGGIKPKKVFC                                                                               | chr20:62284523-<br>62286347_strand=+ NONANN<br>OT                |
| SEP13 | VWVEQVIIRMSQGEAGNRNESGWSR                                                                                           | chr6:161645965-<br>161646164_strand=-<br> NONANNOT               |

|       |                                                                                                         |                                                                   |
|-------|---------------------------------------------------------------------------------------------------------|-------------------------------------------------------------------|
| SEP14 | EVFDRYFEINMVCISLWKLTSQWRFPSLYIYVYIYVYVYVCIYNSYL<br>CLFEVRGYMQTNNEIY                                     | chr8:25292135-<br>25292495_strand=-<br> NONANNOT                  |
| SEP15 | ARVCKPDTLYVFTHVSTYTHAPAAHASVSSSSHPPFSCCLPSQA<br>GAGSFLGDGGSPGCRQPSRQYEDRRPTGLAVRGVAPHRFMIL<br>KSQLPLPAS | chr17:40925462-<br>40948763_strand=+ NONANN<br>OT                 |
| SEP16 | MYNHNNIFLRLRSAQSTYRPHFIAEETSSERLHDMSTDYLTSK<br>WQS                                                      | chr3:185498033-<br>185499568_strand=+ NONAN<br>NOT                |
| SEP17 | NKEAKNHTYKHSIFIIFFRTPKSL                                                                                | chr12:19580521-<br>19580665_strand=+ NONANN<br>OT                 |
| SEP18 | QVAHTLRILLKQFLMVGKKLNNPKHLKL                                                                            | chr5:27252217-<br>27253483_strand=+ NONANN<br>OT                  |
| SEP19 | MFRRLTFAQLLFATVLGIAGGVYIFQPVFEQYAKDQKELKEKM<br>QLVQESEEKKS                                              | chr15:55609385-<br>55613829_strand=-<br> LOC101928527:XR_253377.1 |
| SEP20 | LRKGRLEEEKIVEVENGELSAGCLLNI                                                                             | chr6:10782384-<br>10784044_strand=-<br> NONANNOT                  |
| SEP21 | SEYKRGETHCLIFLPCSYSQRRVHQAVRLMNFGLIKQILKMEF<br>K                                                        | chr5:38972236-<br>38973378_strand=-<br> NONANNOT                  |
| SEP22 | VKVKSYTARCRKICFNESNDTDLITKFELLIV                                                                        | chr11:33278931-<br>33378550_strand=+ HIPK3:NM<br>_001278163.1     |
| SEP23 | NVQCSKNETCKEIGTCDSYTGKTRNYLQDKQMLILVNDFKA<br>AIIIFKEIKATMFN                                             | chrX:100353186-<br>100424873_strand=+ NONAN<br>NOT                |
| SEP24 | KGKKTPOFYRLEITTLIDIMTNFFWRFFTHIFVFLCLPKTSNLLSTL<br>FLHFYCYEYFPSY                                        | chr6:143805412-<br>143806379_strand=-<br> NONANNOT                |
| SEP25 | ELFFPLKNGGEDDPPVATQFAPSQDATAEKAHVWTLWRAAS<br>SRWLPSL                                                    | chr7:100434573-<br>100435233_strand=+ NONAN<br>NOT                |
| SEP26 | HWLIYCTSGSRLCFLWGEGRAGSRSALSPELEFSGGISAASWSW<br>AIKRSFHRSPLSSWDHRCAPSCLGDL                              | chr7:66117889-<br>66118600_strand=+ NONANN<br>OT                  |
| SEP27 | VSIFLPKIVILGRDKGVFLEDVLRHTLLKHWRLF                                                                      | chr9:68400605-<br>68402846_strand=+ NONANN<br>OT                  |

|       |                                                                                                                                                   |                                                                    |
|-------|---------------------------------------------------------------------------------------------------------------------------------------------------|--------------------------------------------------------------------|
| SEP28 | MEFFITRK                                                                                                                                          | chr7:151922816-<br>151923301_strand=-<br> NONANNOT                 |
| SEP29 | MLSPLQQVCLEFCSVSPTSPDCIFSAAQNTSPTPPSSTLLAPPLSR<br>LEEALAAAGGAQAARGQVCPAAADVPLLGTGIGCLLTKRMGKY<br>KLPIPLLANYKPQMGKSRVRGEGWKAEMGVLYRRHLKAREV<br>KKG | chr9:35725443-<br>35728861_strand=+ NONANN<br>OT                   |
| SEP30 | KDQLSLFKNNSPSTIITSR                                                                                                                               | chr11:76248705-<br>76254909_strand=-<br> NONANNOT                  |
| SEP31 | MKFLDLTLALRIQDGNYNNGHEDRL                                                                                                                         | chr7:86606421-<br>86606768_strand=-<br> NONANNOT                   |
| SEP32 | QPLISKNSHWWNKPHQGSKNHGHTQSPTV                                                                                                                     | chr3:15247751-<br>15301267_strand=+ SH3BP5-<br>AS1:NR_046084.1     |
| SEP33 | MQLFVYSAYLSLNGES                                                                                                                                  | chr4:166327097-<br>166327492_strand=+ NONAN<br>NOT                 |
| SEP34 | SQFSEESVSLMIGASQTEIEREKIVLKKDRPFNDCTIISKHVTHISA<br>IPEERENRVQTTYTVTLVENFPKLITATKSQTQEDERTPNRMNT<br>KGNTFIHILFKLQTNKRKENIFKVARGKGWSLGG             | chr15:87878674-<br>87879358_strand=+ NONANN<br>OT                  |
| SEP35 | LIKMGIMVKAEVLARCMAYSKHHKVTYASNYSLCGLMMRIR<br>SKI                                                                                                  | chr3:12568054-<br>12568215_strand=-<br> NONANNOT                   |
| SEP36 | RGSEMIPCLTSQLGGASTSVKLST                                                                                                                          | chr5:138275241-<br>138283167_strand=+ NONAN<br>NOT                 |
| SEP37 | MGWRISTPFSSKRTRCIYQRAFLGPTSCLLLFSTGTPGYATVRS<br>SIFVAGCRTMLKMSTYGSKVWTSRP                                                                         | chr17:4835352-<br>4837123_strand=+ GP1BA:NM<br>_000173.5           |
| SEP38 | MGSQHLPLRVTVRCRCEQGLRLGKKSMSATQQGAMAGAVRG<br>RLG                                                                                                  | chr12:117151124-<br>117175823_strand=-<br> C12orf49:XM_005253937.1 |
| SEP39 | MDEWISKMWYLHTMEYYLGLKRKEILSHATTWVTLEGSMLGE<br>ISQMQDKCCMIPFI                                                                                      | chr10:95057205-<br>95057400_strand=-<br> NONANNOT                  |
| SEP40 | MPTQFFFKREL                                                                                                                                       | chrX:15843934-<br>15863636_strand=-<br> NONANNOT                   |

|       |                                                                                                                                      |                                                                |
|-------|--------------------------------------------------------------------------------------------------------------------------------------|----------------------------------------------------------------|
| SEP41 | LYQRREELKLQWRSFNLDKIVYGDIRKEGILNALETMGSSF                                                                                            | chr8:17873932-<br>17874063_strand=+ NONANN<br>OT               |
| SEP42 | MSRGQFGQGQEPLDMFFWVNEISGEITYPPQKADAPAVSPES<br>PQKKPPFQPRSVQEAPCSPQGPQAQRPALAPPSKPSLKDSGSR<br>NPCPSAPTWARPKPEE                        | chr3:44462454-<br>44493083_strand=-<br> XR_133338 LOC100506301 |
| SEP43 | MLLYGVTLAAKRECLKTSPNVQVVIKSLFASHLLMSHWPKQV<br>TWSPESVWEGTTQGCEYQEAWVCGGHQYIPYTS                                                      | chr20:45298911-<br>45299385_strand=-<br> NONANNOT              |
| SEP44 | MPKNFFISKIKALAYIGARC                                                                                                                 | chr9:88428049-<br>88428393_strand=+ NONANN<br>OT               |
| SEP45 | MPGRDGGRQLAPECGRRRCSPQPSGSGMAGASALLPTDPPEA<br>ETESPRAPSSLPSKSRCSHCRRHDAETKEAESSPATDTAAAPAA<br>RAGRDWR                                | chr6:30522829-<br>30531396_strand=+ NM_0252<br>63 PRR3         |
| SEP46 | MAGGDPAAGRAVGAAKAKRAAGICGDTAAPALSGHPPDCLPE<br>SPGRGGLTCSPSQRFSPLAAGGVRGCGAQLVTVGCSEPSW<br>SPGEGAGPGEQQSLDVEAAEALQAGPASPRCRLLLPCPCCFG | chr6:32780349-<br>32806575_strand=-<br> NM_018833 TAP2         |
| SEP47 | IRKYLDLHERQIFHSNKHLNINIINCKAQTRVK                                                                                                    | chr16:33121842-<br>33122879_strand=+ NONANN<br>OT              |
| SEP48 | RTLSEITQGLGGGIGIRTQLLDLETGFLKGKEGACTLGSDVESEIS<br>KFMVQVCGRAELTLQNC                                                                  | chr17:48178065-<br>48178330_strand=+ NONANN<br>OT              |
| SEP49 | MGFYHIGQAGLELLTSGDPPASASESVEIKGMSHLVWPKEVL<br>RHYT                                                                                   | chr19:40327193-<br>40330486_strand=+ NONANN<br>OT              |
| SEP50 | MGLSKVSVSVTVTLNLVSSVDESEPGICEGEGALVPAGNGIKGT<br>GSGGGG                                                                               | chr14:58955358-<br>58955764_strand=-<br> NM_001244189 KIAA0586 |
| SEP51 | DGGISGKCLIEEYSVGVTTMYDLKKEKDTLLEVL                                                                                                   | chr13:34124857-<br>34125083_strand=-<br> NONANNOT              |
| SEP52 | MVIAMLFVAVKKWKWSKCHQRTG                                                                                                              | chr11:11803558-<br>11805863_strand=-<br> NONANNOT              |

|       |                                                                                    |                                                                  |
|-------|------------------------------------------------------------------------------------|------------------------------------------------------------------|
| SEP53 | MLYDCLCTSFCVDVCFVSRIQKVRILSDKFNKESEIHKKNQAEILEL<br>KMQLTY                          | chr6:118017079-<br>118018042_strand=+ NONAN<br>NOT               |
| SEP54 | DWSSGDEFPPQFKVFLLNK                                                                | chr4:84156218-<br>84156708_strand=-<br> NM_052834 WDR7           |
| SEP55 | MMKNQWMEIGHHQLHQPSRFLHLKHPEILPTVQGSLVQQVA<br>LRLEVLLRKEVLEQLMKMIL                  | chr3:33537746-<br>33759712_strand=-<br> NM_001207044 CLASP2      |
| SEP56 | MNVRNVRRLNVLVVINLFYITGFMSLRDPMNAKSVGRTFVVAIN<br>LLYIKDFILVRNPMNVQNVGRTLEVVIS       | chr19:38230342-<br>38231032_strand=-<br> NM_001172692 ZNF573     |
| SEP57 | MEFHSLPRLECNGTISAHRNLRLLVQAILLPQPPK                                                | chr8:124471523-<br>124472268_strand=+ XR_1117<br>95 LOC100509315 |
| SEP58 | GHLRPSSLSTKLEIILESMSELPYELVLKYNTGS                                                 | chr14:56021802-<br>56026332_strand=-<br> NONANNOT                |
| SEP59 | NLGFQRPLETLVERSWSPLHFQCLVACLAPSGAQ                                                 | chr5:149891915-<br>149892156_strand=+ NONAN<br>NOT               |
| SEP60 | VNFCNKASWDLKKIYNRLYFLEKF                                                           | chr18:9345769-<br>9345975_strand=+ NONANNO<br>T                  |
| SEP61 | MTTGERDSAKPIRATATRQEDRSPEGGWQRQVEGTGTPKSKQG<br>SRVLAAQEETQHPEAVPQRADPKGASASPLRRQ   | chr16:624062-629182_strand=-<br> NONANNOT                        |
| SEP62 | MDELSQYLKVIPLSTVVLDVILLQLSFLLYIANFLFSLGSLP                                         | chr4:83831822-<br>83832435_strand=-<br> NONANNOT                 |
| SEP63 | SQHFGRSRQVDQEVRSRTAWPRW                                                            | chr6:17701564-<br>17701878_strand=+ NONANN<br>OT                 |
| SEP64 | GWGGRGPSNPPSPCLSLLCFSSHFRVHVQCLIESPPPGGAGSC<br>PPGAYGLSRPSRAPAQLGCCASFTSPSSLNLPLFS | chr3:184053746-<br>184068183_strand=+ NM_144<br>635 FAM131A      |
| SEP65 | DFVFNSLSKILVENRPAFVNENIPDITKPKHF                                                   | chr6:10801828-<br>10803161_strand=+ NONANN<br>OT                 |
| SEP66 | FFLAFRLFETKAILFCGCCAALKRWISYFFLC                                                   | chr1:160313607-<br>160313730_strand=+ NONAN<br>NOT               |

|       |                                                                                                                              |                                                         |
|-------|------------------------------------------------------------------------------------------------------------------------------|---------------------------------------------------------|
| SEP67 | MYLLFAAPSLNLQSKFERGRETERERID                                                                                                 | chr2:156867321-156871777_strand=+ NONAN<br>NOT          |
| SEP68 | RVAEIIERLVSHGINLALIFSIWKCLKENHFHCRKSFFKYLLYPREI<br>SLYLPPQAVISCFREWNPPCPSIFWFLGLNSSLVKSPWLGILSWE<br>QILSCSLMCLHSPKTLTYTCLLRA | chr12:122714123-122751118_strand=-<br> NONANNOT         |
| SEP69 | MVAIVVARVVTIPKIMHQPVLSFLNFHVPLYTFMSVYVDLSLV                                                                                  | chr8:9565334-9565564_strand=+ NONANNO<br>T              |
| SEP70 | AGDFLNLRIGISYQFCKFSPINYFFLFSPCLLYGILLDIS                                                                                     | chr2:108294549-108364747_strand=-<br> NONANNOT          |
| SEP71 | MADDKDSLPLKDLAFLKNQLESQRVEDEVNSGVGQDGSLL<br>SSPFLKGLAGYVVAKLRAVAVLGFVGTCTGIYAAQAYAVPNV<br>EKTLRDYLQLLRKGPD                   | chr5:139941187-139946658_strand=+ NM_080<br>670 SLC35A4 |
| SEP72 | GTTFSWVIRLLFAGKLNYSMS                                                                                                        | chr8:99962637-99963699_strand=-<br> NONANNOT            |
| SEP73 | QRVQAERLAIRARLKREYLLQYNDPNRQGLIENPALIRWAYART<br>TNVYPNFRPTPKNSLMGALCGFGLIFIIYIIKTERDRKEKLMQE<br>GKLDRTVHLSY                  | chr4:43901065-43901402_strand=+ NONANN<br>OT            |
| SEP74 | TFISPHIYEETLEIAARKCTP                                                                                                        | chr2:82967185-82967587_strand=+ NONANN<br>OT            |
| SEP75 | LFFHDFINLKAHRKVAPLITCMETSVLVNSISQS                                                                                           | chr5:127419792-127524262_strand=+ NR_0462<br>07 SLC12A2 |
| SEP76 | IWSRVVTLTLQSSENQRQNIKGLENILQKEAATCVDNGLFMPLL<br>LSLTV                                                                        | chr16:15198209-15199311_strand=-<br> NR_003610 PDXDC2P  |
| SEP77 | MAPLGLKDPLSSWLTPVAGKLVMAVS                                                                                                   | chr2:65855310-65855473_strand=-<br> NONANNOT            |
| SEP78 | NSTNFFLLIKQRSFGGFIPIADKRGKDGKCSRFLSFHKQEFHALPL<br>LKQRKE                                                                     | chr16:11933549-11935884_strand=+ NONANN<br>OT           |
| SEP79 | TGAGILLLRWLTHWLLAGSLRSSPGVPLHVLLHGLMMWHEPH<br>SV                                                                             | chr18:9864909-9865248_strand=+ NONANNO<br>T             |





|        |                                                                         |                                                            |
|--------|-------------------------------------------------------------------------|------------------------------------------------------------|
| SEP93  | NTHPHLLDNNIFPFNNALILIRHKHFNGG                                           | chr13:108521011-108526878_strand=+ NONAN<br>NOT            |
| SEP94  | TQEVEGAVSRDCITALQPGKQSEVMSQKQTTKIFNNHTLIK                               | chr1:52960264-52960434_strand=+ NONANN<br>OT               |
| SEP95  | SSGKGKSNSQRDFTSHQLERLSSKRQNIKRVGKNAEKRPPLYTI<br>GWNLNWYSHYKKQHGGSSKN    | chr7:12450740-12451773_strand=-<br> NONANNOT               |
| SEP96  | SQPPLKCLCLIKINALLKGNILLSNKCGCVFYHTSILRKCWTSEYH<br>KTGN                  | chr13:108521486-108526772_strand=-<br> NONANNOT            |
| SEP97  | VRMLDLLIQLQVPAAVW                                                       | chr11:64002664-64006302_strand=-<br> NONANNOT              |
| SEP98  | ESCPEPTEQKGLSFQPPHHVQSSPDVKSQFWF                                        | chrX:119745582-119754975_strand=-<br> NM_014060 MCTS1_v1v2 |
| SEP99  | MCLPFLYTVLLPKLPSVDL                                                     | chr8:9403098-9403311_strand=- NONANNOT                     |
| SEP100 | HSLLNIRSFILVRSHLNVRSVGRPLIVAQTLFNLRVFILVRNPMNV<br>RSVGRLLDFTYNFLCIKNLYR | chr19:40529109-40596836_strand=-<br> NM_001005851 ZNF780B  |
| SEP101 | APFLGGLPCVLEEGERARILGSWLSELPDTGSEHVPGILSCQQ<br>GPG                      | chr11:134094604-134117677_strand=+ NM_052<br>875 VPS26B    |
| SEP102 | QTKTRLLITTSRLIVNSKRPRNSEGRLSDTPTSIRLEYPS                                | chr9:115980741-115983650_strand=+ NONAN<br>NOT             |
| SEP103 | MMTNSTFPRRYNRSHYQKPYNNNLRETLAQKP                                        | chr19:50840986-50856670_strand=+ NONANN<br>OT              |
| SEP104 | MPSPQKIGTAFLNKKE                                                        | chr16:53728816-53730245_strand=+ NONANN<br>OT              |
| SEP105 | KLLLDLNKSQLGKISRQKIFMAC                                                 | chr10:15478885-15479329_strand=+ NONANN<br>OT              |
| SEP106 | YTDAVVLVYFKQVKALIK                                                      | chr16:72452815-72454466_strand=+ NONANN<br>OT              |
| SEP107 | RVFICIFRASFKINYKKVQLKIGESFEKSKITVCPEEELLHSYSKEGQ<br>N                   | chr3:197787735-197789967_strand=-<br> NONANNOT             |

|        |                                                              |                                                  |
|--------|--------------------------------------------------------------|--------------------------------------------------|
| SEP108 | VISTYEMGVDFLPQKINIKKKIIQYI                                   | chr8:91519522-91520168_strand=- NONANNOT         |
| SEP109 | TLLSDHVLGAVSNQLIPKHNLKPNLSLQKGFILRGRYQKRT                    | chr21:35275511-35288046_strand=+ NONANNOT        |
| SEP110 | VPSGAWGTCVAIFSRGSLALFLPRGPCPCRAPSVVEGENMK                    | chr11:2391037-2391433_strand=- NONANNOT          |
| SEP111 | GVSLEPKVESGRQPELRLPQDSDLRITPPTSNPESIFLLGENAYI<br>YFL         | chr16:16170189-16236878_strand=+ NM_004996 ABCC1 |
| SEP112 | KFLENNDDGNATDQKLWDTTKAGLRGKFIAIIAYIKKEKNL                    | chrX:120338054-120341958_strand=- NONANNOT       |
| SEP113 | WSWRLLLLPLNIRTPGSEVFELLNLHKQALRFSGLQLKTES                    | chr12:74853896-74854278_strand=- NONANNOT        |
| SEP114 | DILLHDFLASIEVIIRFFSINL                                       | chr21:20167140-20167299_strand=+ NONANNOT        |
| SEP115 | IKSINYICIWEIEKVHISHDFEVKRERIFGKEG                            | chr5:34183374-34185173_strand=+ NONANNOT         |
| SEP116 | KYWATPTIKIPLSIVIRKRFIKMFSNRLTHMRQVRFAHATPEAV<br>SG           | chr5:81078543-81079471_strand=- NONANNOT         |
| SEP117 | MNYPSRYILRSFDFINLRGRKQLFPLY                                  | chr16:8991978-8996350_strand=+ NONANNOT          |
| SEP118 | KNNKFLKSTLFSGLFVIKCNVFKSSIS                                  | chr2:69476143-69476401_strand=+ NM_032208 ANTXR1 |
| SEP119 | ITRVKIHQHLALGALRSDFRLTY                                      | chr22:26860929-26864708_strand=+ NONANNOT        |
| SEP120 | ESLTEKDPTFKFMKLNKDEFNYC                                      | chr7:6789180-6793491_strand=- NONANNOT           |
| SEP121 | LSELSNGVFLHENLEGIATKPGKERTMVPMEKVHK                          | chr20:25712848-25713130_strand=- NONANNOT        |
| SEP122 | MVHCSLDLPGPILLPQLAVVAGITGVYHHTWLIFFFFGRHGVS<br>LCGPGSSLIPGLK | chr5:80597485-80605440_strand=- NONANNOT         |
| SEP123 | ISCPEKYPRFSFILNFPLSRSHSLLSLSSHSD                             | chr1:161284832-161284990_strand=+ NONANNOT       |

|        |                                                                                                                                 |                                                           |
|--------|---------------------------------------------------------------------------------------------------------------------------------|-----------------------------------------------------------|
| SEP124 | IAAPGQACSGRWVDTQKTGPESVGGGTEPRGGQVGARRSSP<br>HYQGLVD                                                                            | chr7:44800637-<br>44801496_strand=-<br> NONANNOT          |
| SEP125 | WFHSCQLLGLKGKKYNIH                                                                                                              | chr9:128724377-<br>128729551_strand=+ NR_0241<br>23 PBX3  |
| SEP126 | LPCDLYRNIRGGEAGDITSRIAAGALSPLRCGS                                                                                               | chr11:3408735-<br>3430083_strand=+ NONANNO<br>T           |
| SEP127 | PHSVTNTQKSLNSVISEVILR                                                                                                           | chr16:18089134-<br>18089599_strand=+ NONANN<br>OT         |
| SEP128 | MCAEIEEGAEGVTARDQYGHLIPTKVASGPQGLSGARKPSFPSP<br>RLRGSCHFLSQVGGWGI                                                               | chr16:29982572-<br>29984370_strand=-<br> NONANNOT         |
| SEP129 | AKIVPLHSSLGDRVRPCLKTKQTKEFRNDLAFIFLPDRQCIHQDG<br>TLTGNQVLAPLLAGKEHEVF                                                           | chr15:31218600-<br>31220691_strand=+ NONANN<br>OT         |
| SEP130 | KGLFLLLGQKISLTKQKGALSSELPQTIYWGPVKRQMSKDSKFI                                                                                    | chr17:56066228-<br>56086144_strand=+ NONANN<br>OT         |
| SEP131 | GFLFQLCLHYLHSIIPSSLNLLMGRTQPPTTKLTVRVL                                                                                          | chr14:95645271-<br>95645404_strand=+ NONANN<br>OT         |
| SEP132 | WSCGLKCVISDRLLLLSIAPGDGSSEKVSYLASWRSDKDSPCGV<br>GLCRKSINKSLEETFCILGIGVLCANQGSVFSMSFSGIVVALNCFC<br>LVLGCLEFWEKLLGSMALFLLSKYAEISS | chrX:154159069-<br>154159686_strand=+ NM_000<br>132 F8_v1 |
| SEP133 | MQLAFICSSITTATSEVLVTIISRLAM                                                                                                     | chr13:98012703-<br>98018647_strand=-<br> NONANNOT         |
| SEP134 | KKNFRRSPAVNISAVRILGRRHGS                                                                                                        | chr2:234384197-<br>234469870_strand=-<br> NM_018218 USP40 |
| SEP135 | QSKTPSQKKKKKKKSQQHTHGDIFLKNSHKIK                                                                                                | chr11:114325616-<br>114326071_strand=+ NONAN<br>NOT       |
| SEP136 | MPSLSVPLSYLDRQMGSVLVLIHHSYRHCSDBGTQGTSQRGSLS<br>REQLTEH                                                                         | chr1:161136224-<br>161147286_strand=-<br> NONANNOT        |
| SEP137 | KVLVETHAFLTVTQELL                                                                                                               | chr17:76001568-<br>76001690_strand=+ NONANN<br>OT         |

|        |                                                                                                                                                     |                                                                |
|--------|-----------------------------------------------------------------------------------------------------------------------------------------------------|----------------------------------------------------------------|
| SEP138 | MMKKWATMNTLNFNISKLVLHVSVDNVLDVLF                                                                                                                    | chr8:66567401-<br>66567615_strand=+ XM_0038<br>46486 LOC400682 |
| SEP139 | FGEVKARPPLGLKGHFQTFLSVTWSVYASHISLINSSTFYLTAVI<br>MVGRGARDGFTYCTEM                                                                                   | chr3:10157357-<br>10169022_strand=+ NM_0184<br>62 BRK1         |
| SEP140 | MSMCVRNSIQGWRRHFWF                                                                                                                                  | chr16:15112097-<br>15124265_strand=-<br> NONANNOT              |
| SEP141 | MLFSSTLPMPISIFLMFRSHLRCHFHCSTSS                                                                                                                     | chr13:33080751-<br>33086968_strand=-<br> NR_026928 N4BP2L2-IT2 |
| SEP142 | SRHSWKAERYRPLIKDLIFILNPRPPKRGKCHGTRCVAFLSSAPL                                                                                                       | chr12:57411725-<br>57411927_strand=-<br> NONANNOT              |
| SEP143 | LCDLLSKHDMVKIRIRHDEG                                                                                                                                | chr3:110639864-<br>110640215_strand=-<br> NONANNOT             |
| SEP144 | MNFVSDMLNLRCSWSQSNMSLVLRKELWSQGSSNSLQSMGI<br>C                                                                                                      | chr21:34020720-<br>34021204_strand=-<br> NONANNOT              |
| SEP145 | MRGPPPGRRALEANEACLPIWEWRGEEET                                                                                                                       | chr8:80942254-<br>80942687_strand=+ NONANN<br>OT               |
| SEP146 | NTYCLALCRKSLTLPDVNFKLHKKTG                                                                                                                          | chr8:124530101-<br>124530292_strand=-<br> NONANNOT             |
| SEP147 | MLLIPTSPHPQHLLSAQSTPITRKGLFLKGPTGLVLLWNPVLES<br>TL                                                                                                  | chr6:17759506-<br>17762318_strand=+ NONANN<br>OT               |
| SEP148 | MYIDECLQLQQVFLHALAVDVLQDTRAARPRRPWRGQQPPST<br>SPMQDGELNRFPGRYPAGGSNASCLTLISSSKDRLPKDGSGEW<br>GPAPFFFFFLPGWSEMARSRLTATSASQVQAIFLPQPPE                | chr19:55649318-<br>55653007_strand=+ NONANN<br>OT              |
| SEP149 | GWDQVYGEENDFLILFPCACVCM SVYIFRDVVFVPLHKCYSFM<br>FHGYLE                                                                                              | chr5:88014045-<br>88018690_strand=+ MEF2C<br>NM_001193350      |
| SEP150 | RVPDRWSPTPKKEAETWSCARQWQWPVHAGLASIAAGRPSH<br>RPRRGGEQPHHAAPAQEAEEKEGRARQP GALWPAQPENSKF<br>EKEEENESDVKLGGAQRGAGVRSWATPGSGKQWDLQFPEEA<br>EAEGRERLCEV | chr21:45105748-<br>45115959_strand=+ NONANN<br>OT              |

|        |                                                                                                                       |                                                               |
|--------|-----------------------------------------------------------------------------------------------------------------------|---------------------------------------------------------------|
| SEP151 | MWVQGPHVPLPLPVMCESEGLWHLLEAQGVNERELLWLES<br>LWGLGCQSTRQARTWRAQTLSPGGQEARWGPCLKDWSP                                    | chr1:31342371-<br>31361123_strand=-<br> SDC3:NM_014654.3      |
| SEP152 | FFSIFRRDRFSRWPGWSRYPDLVIRLPLPPKVLGLQV                                                                                 | chr1:150343960-<br>150344120_strand=+ MPL:NM<br>_005373.2     |
| SEP153 | LKAKLQITSYKYNICWELNTYIKYWTVQNVEMKHKR                                                                                  | chr15:49280838-<br>49285216_strand=+ SECISBP2L                |
| SEP154 | GERACSKINLMLDRD                                                                                                       | chr17:67992904-<br>67996880_strand=+ NONANN<br>OT             |
| SEP155 | CKSELNIKNCVNTIDIGITLKY                                                                                                | chr10:124768480-<br>124817809_strand=+ ACADSB:<br>NM_001609.3 |
| SEP156 | MEALFVPEKKKLKTQRPTNRMDKMNISIQSNIVNE                                                                                   | chr7:32735224-<br>32735731_strand=-<br> NONANNOT              |
| SEP157 | EQQRHPQEPGIAGGGGERGVGHGAQQTRREAVREAGELAGR<br>CLRPGLCGSPRSANPFYAWLRLESPPERPGQNSRSSRSIRSPEG<br>RRRPRPRGGVGYG            | chr4:74904262-<br>74904922_strand=+ CXCL3                     |
| SEP158 | MLLDIQYILKKFSMNPSIKQIIQGAIKFMFSKIKSS                                                                                  | chr2:17844495-<br>17850489_strand=+ SMC6                      |
| SEP159 | GKYSYLEKENFLDKFLKL                                                                                                    | chr8:9423769-<br>9423869_strand=+ NONANNO<br>T                |
| SEP160 | KGAWVLVNCLLDLEIKENTGERRFSIECGFFTQETLQGIRGTCPO<br>YFNVGSFYFP                                                           | chr13:70234870-<br>70235374_strand=-<br> NONANNOT             |
| SEP161 | MRIIPALLEADEGYPFVRSWRPAWPIW                                                                                           | chr3:163403983-<br>163404349_strand=-<br> NONANNOT            |
| SEP162 | KEFDLLSKVFQTLKLHICH                                                                                                   | chr1:83599137-<br>83599370_strand=+ NONANN<br>OT              |
| SEP163 | SKKKVKDRKLENLMPAKDGLIIVERSLALCMLR                                                                                     | chr6:99387016-<br>99387302_strand=-<br> NONANNOT              |
| SEP164 | GCEADDVHTAQVSILADNCPFKLFQPHPVRYQRRQQLAQPGLL<br>AGQAREGSSGPEAPKPLHDTCPYVQCLEDGGLRGDQGPAFHA<br>GESPAAPGPPEAQPHISDPHLVLR | chr20:42295716-<br>42345131_strand=+ MYBL2:N<br>M_001278610.1 |

|        |                                                                                  |                                                             |
|--------|----------------------------------------------------------------------------------|-------------------------------------------------------------|
| SEP165 | ASRTLQSFFIGSIRCLFPTRAIQQVLKEN                                                    | chr8:125467607-<br>125470995_strand=-<br> NONANNOT          |
| SEP166 | RPTWSRCGTNKVLRVSFAAFCWQRECTLVMKPLEFLKREFLQ<br>PPIHQIVCSRMMWMMKGRSLSWATYLRT       | chr2:239152640-<br>239197306_strand=- PER2<br>NM_022817     |
| SEP167 | SSRVKDYLFKFMCSHTYFVT                                                             | chr2:47600600-<br>47601323_strand=-<br> NONANNOT            |
| SEP168 | AYQGREYRQRKGSPLLFLQVFQHEGVREMGRKPHKD                                             | chr4:86297867-<br>86298058_strand=-<br> NONANNOT            |
| SEP169 | MVYFCFTIIPRMLSFRLSNQRILPESQPWRSYTFNVRPSSLPKYTT<br>HVFSFLANKSPLQSKSRLNSKFNF       | chr5:44812872-<br>44828662_strand=- GATA6-<br>AS1           |
| SEP170 | MQSHQALPLLLLQVEVDHHVNAAVDGTVELLRQIAGQDQHE<br>SVGQGWGRKRWGCQLRCPEGNGGSSAPSGRLFGRI | chr1:1424437-<br>1425809_strand=- NONANNOT                  |
| SEP171 | LVTFEDLGLIWNNQRKQELPLY                                                           | chr2:205660031-<br>205660209_strand=+ NONAN<br>NOT          |
| SEP172 | ECKMVQLLKLEVEVPEKIKHRVMFMY                                                       | chr2:10244681-<br>10248113_strand=+ NONANN<br>OT            |
| SEP173 | SPSDENYKAASSKEVNTDESSAAGVFHMR                                                    | chr11:77319073-<br>77325243_strand=- AQP11<br>NM_173039     |
| SEP174 | LKVGKIAWLEFKSLPLGPKPEILHLQPTENALEGCSPLIR                                         | chr3:128996926-<br>128997117_strand=-<br> NONANNOT          |
| SEP175 | EPNGIKRIESEGGGEGWGRESIQESW                                                       | chr2:231589548-<br>231590185_strand=+ BANF1:N<br>M_003860.3 |
| SEP176 | MPMEPALIVAFCFDEFELEPEQDCCKQ                                                      | chr1:67751219-<br>67751585_strand=+ NONANN<br>OT            |
| SEP177 | LWTFILYCRNQYLFLGGYVKDLKNYYLVCSL                                                  | chr1:150317600-<br>150318971_strand=-<br> WDFY3:NM_014991.4 |
| SEP178 | ERGAGAGPHLGPQVEGGLQVQVQRGSALLRERPPRAGVRRHL<br>QCL                                | chr22:22308818-<br>22337181_strand=-<br> TOP3B:NM_003935.3  |
| SEP179 | GNITHQILLGGMWQGEEDH                                                              | chr1:195789567-<br>195789749_strand=+ NONAN<br>NOT          |

|        |                                                                                    |                                                           |
|--------|------------------------------------------------------------------------------------|-----------------------------------------------------------|
| SEP180 | LLAENLPIDFLNIRKIPN                                                                 | chr8:30535597-30585324_strand=-<br> GSR:NM_001195104.1    |
| SEP181 | GRIESWNRKTGEKHRVCSLISTIVRLIS                                                       | chr7:22510284-22510452_strand=+ NONANN<br>OT              |
| SEP182 | MAMGKGQEVLRWEVSALTGLSGGL                                                           | chr5:10158411-10158577_strand=+ NONANN<br>OT              |
| SEP183 | HPTQPAQRLPIISDPLLLLPSHTAWL                                                         | chr1:24034077-24035038_strand=-<br> NONANNOT              |
| SEP184 | MLLNPPMKIFHYKTVFHTTAS                                                              | chr1:212531453-212535680_strand=-<br> PPP2R5A:NM_006243.3 |
| SEP185 | NCPAHGKPYLVYFGIILLILLYCCGIYCCCTLCVIRMQDKLAKIFLN<br>GTYIHLDPVTFCKDSEL               | chr8:56636872-56637117_strand=-<br> NONANNOT              |
| SEP186 | TPPISIESRGEKCRIQQFLTNCNILSWLPYINKE                                                 | chr6:4823265-4824846_strand=+ NONANNO<br>T                |
| SEP187 | NCTRTADGCELPRLNKINYNKLLTLFSM                                                       | chr15:41849141-41849860_strand=+ NONANN<br>OT             |
| SEP188 | THTFCGVYSFLVNAVQLLM                                                                | chr9:100689089-100700593_strand=-<br> HEMGN:NM_018437.4   |
| SEP189 | TSTTSLSGTTWTRCTSPLASISWTKSFQEMLPPLVLRFRRLMTT<br>AMTSKVRSRRYIWSSRSRRLSSEPAEKQKGETNT | chr16:89590029-89594505_strand=- SPG7<br>NM_003119        |
| SEP190 | RSTNSLLSTNSGVEKVGCHCL                                                              | chr12:69813707-69814545_strand=+ NONANN<br>OT             |
| SEP191 | TLQIINHRLNSERLINSNTEVREKQDLKWTLVCGIE                                               | chr3:112539900-112542022_strand=+ NONAN<br>NOT            |
| SEP192 | KSGQFSYFFVCLAIIILSERDALKVAGRQTDLL                                                  | chr1:110882061-110914912_strand=+ NONAN<br>NOT            |
| SEP193 | TWEAEVAVSQDGAIALQPGRQERNISISKKRKKENGNLTFSLIA<br>FKGLALCLKDIL                       | chr9:95194519-95194749_strand=+ NONANN<br>OT              |



|        |                                                                                                                                   |                                                                 |
|--------|-----------------------------------------------------------------------------------------------------------------------------------|-----------------------------------------------------------------|
| SEP194 | DVSLVETEQNIVALELRFAGTEDTLVSQVLVHLLQALQALGHVLI<br>IDLGIKGGHGLLTHEVGTVDVKPGALLNQGHRQGVTEVLLRDIL<br>ATGEGEDHSHIPMQRGNREKDHATTSISHFSI | chr21:47685600-<br>47693148_strand=+ NONANN<br>OT               |
| SEP195 | ELRKAKVLFCLFLFIYLYNY                                                                                                              | chr4:145030055-<br>145038548_strand=+ NONAN<br>NOT              |
| SEP196 | LYRQDNWVGLLWGNPPSITIWGCGEAILQRSFQLKGDGVFVLK<br>SGRAWFLGFKDWAF                                                                     | chr12:94688630-<br>94690814_strand=+ NONANN<br>OT               |
| SEP197 | MTVQRRHGDEITHGALTGNELGSFDVHIRSCRFLPLGLMAQE<br>HCYILPAAFELEVGW                                                                     | chr1:53384961-<br>53385662_strand=-<br> NONANNOT                |
| SEP198 | LLELAPLTCFGCLDCKWKSILLTHIGAPPHTP                                                                                                  | chr14:59925205-<br>59931181_strand=-<br> NONANNOT               |
| SEP199 | HLLQLRFFLSWNFLGFIVANQLTINLEFVSGLRILFH                                                                                             | chr5:27717055-<br>27717588_strand=-<br> NONANNOT                |
| SEP200 | CIGICIYTHHLKVIIMENTKDIFTSTIRSKARISSNYAIIHHITGNIS<br>QYS                                                                           | chr2:160547202-<br>160547607_strand=-<br> NONANNOT              |
| SEP201 | NGVGPDRLLGLESLLFLQMTS                                                                                                             | chr14:23741387-<br>23746392_strand=+ NONANN<br>OT               |
| SEP202 | QMPSEVTVTAIARDDD                                                                                                                  | chr14:57430195-<br>57430368_strand=-<br> NONANNOT               |
| SEP203 | CCNKVELQTSQRNLRAMSEFWKEINWNIPLLSWQPPKGFNA<br>PCQIFDSIF                                                                            | chr1:165664398-<br>165664673_strand=+ NONAN<br>NOT              |
| SEP204 | EKERTLQVLRLEIHGCAQPVLSRPETLGVGARRQRSQIVVS                                                                                         | chr8:126009798-<br>126010145_strand=-<br> NONANNOT              |
| SEP205 | KSEGMLEQKSQIKMKYENIT                                                                                                              | chr6:88240174-<br>88240816_strand=+ NONANN<br>OT                |
| SEP206 | NLIKITVCACVCSVTIDEIRLFMSVKIEAGRWWCEDSVCHSFYN<br>TFLYV                                                                             | chr6:148065557-<br>148066827_strand=+ NONAN<br>NOT              |
| SEP207 | GSEIFKPPGPRCKPSAKISAGGRSAF                                                                                                        | chr14:61744089-<br>61748530_strand=-<br> TMEM30B:NM_001017970.2 |

|        |                                                                                                                                                       |                                                                 |
|--------|-------------------------------------------------------------------------------------------------------------------------------------------------------|-----------------------------------------------------------------|
| SEP208 | MPTGSSPHLLPSRLNSAHLGPCNSQPSSGLMSSKGLDDPLPQP<br>PSPEGLCPVCSPVDQGRSQGATPSKGCWLTLESQGGAVPHP<br>VMTLSEQGGARGRAEWGWAPAGHQGLRASSPWATLFLRGIL<br>KTSENPKCVRVS | chr13:29283091-<br>29289675_strand=-<br> NONANNOT               |
| SEP209 | SIGFIIGINLVLDFIKLYLVQLILTITTVFLAIVCSD                                                                                                                 | chr14:75745481-<br>75748937_strand=+ FOS:XM_0<br>05267488.1     |
| SEP210 | RRHPPDQQLIFAGKQLEDGGTLDYNIQKESTLHLVLRGG<br>MKIFVKTLTGKTITLEVEPSDTIENVKAKIQDEEGIPDQQLIFA<br>GKKLEDGRTLSDYSIQKESTLHLVLRGGC                              | chr17:21729873-<br>21731760_strand=+ NONANN<br>OT               |
| SEP211 | GFPWLFSSGLSYCASGSYWCHFMIVKKLPNLKQNDQKPSGKR<br>EPIHSTEDPQVLLKM                                                                                         | chr2:160958233-<br>161056589_strand=-<br> ITGB6:NM_001282355.1  |
| SEP212 | QVGAGWGLNVKRQWQAAGVERAQQP                                                                                                                             | chr17:77751977-<br>77761449_strand=+ CBX2:NM<br>_005189.2       |
| SEP213 | MQRVQMHLLEKLLLLLPCGLCQVCPGLHLQRGVGVQVLLRL<br>MLGQPRSQM                                                                                                | chr16:56642478-<br>56643409_strand=+ MT2A:NM<br>_005953.3       |
| SEP214 | FCLSNDFFKSIIYIGIFQNSNCHIKKHNDLNDLNKNTVPIKIRQL                                                                                                         | chr2:160802326-<br>160919126_strand=-<br> PLA2R1:NM_001007267.2 |
| SEP215 | MPSRGTRPEDSSVLIPTDNSTPHKEDLSSKIQKIVVDELSNLK<br>KNRKVYRQQNSNIFFLADRTEMLSESKNILDELKKEYQEIENLD<br>KTKIKK                                                 | chr2:190526125-<br>190535557_strand=+ ASNSD1<br>(NM_019048)     |
| SEP216 | ILSLGWWKLIFEIKNPARTVKPQGMALQVRRSLGP                                                                                                                   | chr14:51800111-<br>51832275_strand=+ LINC0064<br>0:NR_038358.1  |
| SEP217 | RTYVLPQTIFLCPFHSLVTLPLLRGNCYSDFYCCIFLLPLEFYMSG<br>ITH                                                                                                 | chr17:35990853-<br>36002800_strand=-<br> NONANNOT               |
| SEP218 | MDYIMKEYVKRTYSNAQSLICV                                                                                                                                | chr20:13370036-<br>13619583_strand=-<br> TASP1:NM_017714.2      |
| SEP219 | LLSRIPWYGCTTVCLTIHLLKDKRVVFSFLPLLIKLL                                                                                                                 | chr8:146220251-<br>146224283_strand=+ TMED10<br>P1:NR_002807.3  |

|        |                                                                                                                                                        |                                                                |
|--------|--------------------------------------------------------------------------------------------------------------------------------------------------------|----------------------------------------------------------------|
| SEP220 | MSRLLPVITLLSRHVAQLLSKVKQTQPVAISITQVTGFAGMMM<br>G                                                                                                       | chr18:31158541-<br>31327399_strand=+ ASXL3:XM<br>_005258356.1  |
| SEP221 | MVTKIQMAQKRIFSLALMEGMKQLQVMIPAQMKALLPSQM<br>TSVMSLSILLKRRRRRMRKTLGEWQKGTMLILKV                                                                         | chr9:470294-<br>746103_strand=+ KANK1:NM_<br>015158.3          |
| SEP222 | HKYNLKVILENMEILKFYFTFS                                                                                                                                 | chr1:186265405-<br>186283688_strand=+ PRG4:N<br>M_001127710.1  |
| SEP223 | LCRAIDIERPNNRLQWGL                                                                                                                                     | chr10:76871393-<br>76941881_strand=+ SAM8:N<br>M_001174156.1   |
| SEP224 | GPASGVLTTGGARTPRETAGAERAAPGPRGTATGGRRAGPGAG<br>RLRAAALDPTRRERPRDAEQEEVQRAVPAGADQEDHADGRR<br>DWEGGGGGACHHLPGARALPRVAVEEGLPGDPVAEREDHDH<br>IPPEAVHRAGAAV | chr11:65686728-<br>65689048_strand=+ DRAP1:N<br>M_006442.3     |
| SEP225 | EVRSFSGNPAVEEGTTQEN                                                                                                                                    | chr20:306239-<br>310867_strand=+ SOX12:NM_<br>006943.3         |
| SEP226 | ARGPGPGEQAAPGPAAPAEGRVHCGGAARPARATDGAPRA<br>GGGGRQGGAGHPPGQSPLIRDCPPAAACLWHPLGPWPQPLPG<br>T                                                            | chr1:228395861-<br>228566575_strand=+ OBSCN:N<br>M_001098623.2 |
| SEP227 | LDPGQDARAHIHSETLVTSRHRVAVGGGR                                                                                                                          | chr15:65488337-<br>65503840_strand=-<br> CILP:NM_003613.3      |
| SEP228 | PPGGEAASTVRTAQTAGRAAWRRRRCRPPPTCCATSR                                                                                                                  | chr17:3827163-<br>3867758_strand=-<br> ATP2A3:XM_005256658.1   |
| SEP229 | EIHKKLKKILEMELIQE                                                                                                                                      | chr1:78409737-<br>78425885_strand=+ NONANN<br>OT               |
| SEP230 | FIGSLITYPKPSSVLGNWETGVVSAIVELVKI                                                                                                                       | chr19:522521-522833_strand=-<br> NONANNOT                      |
| SEP231 | FQYMEINTAGQSLERMGVENEKLVVRLVRIVFAHF                                                                                                                    | chr2:99862519-<br>99863895_strand=+ NONANN<br>OT               |
| SEP232 | SSSPKQPQNYMALVLITRLDKPQLKQVLSKQSLCMWTKK<br>GPTIQTNLKSHLIFLWGTAFPNYVTVLWLNLFSTLSSQGQR<br>TECPKS                                                         | chr17:40970559-<br>40972008_strand=+ NONANN<br>OT              |

|        |                                                                                                                                                     |                                                            |
|--------|-----------------------------------------------------------------------------------------------------------------------------------------------------|------------------------------------------------------------|
| SEP233 | IISYKSTLLNNHIIKIIARKWTIFTMFCKLASVWICTLLVKYI                                                                                                         | chr11:14665294-14895861_strand=+ PDE3B:XM_005252972.1      |
| SEP234 | KYNLQMIQCHFIDSFLLFLTLYSIPLCGPNMIYSTTLCMSL                                                                                                           | chr14:27991709-27992439_strand=+ NONANN<br>OT              |
| SEP235 | AAGGQAACGLAQSRAAGGGWTQGHTGCGSEQAAGRGGE<br>RRKGVLTGTEPARWAPGTSCGRRRAGRVGAGHRARSGRS<br>PWRLELPALPRRPRVEREPGRERAGLVGVRGQARP GPWSW<br>SSCAGRHGTESLPARGP | chr4:1803098-1810596_strand=- NONANNOT                     |
| SEP236 | MGLSICIQVEVCLVAGKQSRKKETLGLLVQAERWGLDWRGGF                                                                                                          | chr2:74257245-74259066_strand=+ NONANN<br>OT               |
| SEP237 | MVCLEVRFPARTSWPPHTVQDVVFKMHH                                                                                                                        | chr17:37682110-37691204_strand=-<br> NONANNOT              |
| SEP238 | MHRLHFSDRGDNRVTGFVTPGERGQKVDQENHSCGLQSQ<br>GPILDLVKSNS                                                                                              | chr17:37710622-37710961_strand=+ NONANN<br>OT              |
| SEP239 | WWCTPVVPAIQEAKVAGSPEHKSSRLQ                                                                                                                         | chr7:757156-757313_strand=+ NONANNOT                       |
| SEP240 | TLLASRLPTMHSAAHKLNHWMGEGTMAQRGQVTCLRSRSL<br>TTITFGLAPPTSPGPGPKHLPQGTAPQSGRGG                                                                        | chr3:14520433-14530859_strand=-<br> NONANNOT               |
| SEP241 | LAGLLAFIQRTKDQ                                                                                                                                      | chr17:35684526-35684974_strand=-<br> NONANNOT              |
| SEP242 | QTRVATVSNNILCISKLEERT                                                                                                                               | chr16:8742491-8744671_strand=+ NONANNO<br>T                |
| SEP243 | KDLSFAIQINPWPDI                                                                                                                                     | chr6:104975101-104975201_strand=-<br> NONANNOT             |
| SEP244 | PGVALSSLPRCQRGKQMVAPG                                                                                                                               | chr6:31606802-31611451_strand=+ NONANN<br>OT               |
| SEP245 | MRDSELLGVHYLRPFLVKELRTLKCKMQDENVSGEALSG                                                                                                             | chr19:23921996-23938778_strand=-<br> ZNF681:XM_005259770.1 |
| SEP246 | MICYTSQLVLYHLVTDITKHWFY                                                                                                                             | chr9:2039912-2046006_strand=+ NONANNO<br>T                 |

|        |                                                                                                                                                               |                                                               |
|--------|---------------------------------------------------------------------------------------------------------------------------------------------------------------|---------------------------------------------------------------|
| SEP247 | AWFSSAPPGVSGPGPALIQPWEQLSSQQQPREGARLAGRDEG<br>GQSGQKKQDMPGQWSREQACRAGRQEVGWSHK                                                                                | chr16:67963770-<br>67967286_strand=-<br> NONANNOT             |
| SEP248 | TYFINLSIILIFYYSFIREFVEHLFYVIDTRNEIVKKENLLPRNIHSGI<br>KV                                                                                                       | chr17:68010245-<br>68038237_strand=+ NONANN<br>OT             |
| SEP249 | KTLLLMCMKLLVPLSNWRNDFSFKKNYSGIHLLFKIHWVNHLYL<br>E                                                                                                             | chr6:143771955-<br>143810369_strand=+ PEX3:XM<br>_005267181.1 |
| SEP250 | MQQRQERQSLENVKVMKCAGLD                                                                                                                                        | chr17:20056612-<br>20057839_strand=+ NONANN<br>OT             |
| SEP251 | MAGGLGCDVCYWFVEDTQEKEGILPERAEEAKLKAKYPSLGQK<br>PGGSDFLMKRLQKGYFDSGDYNMAKAKMKNKQLPSAGPDKN<br>LVTGDHIPTPQDLPQRKSSLVTSKLAGGQVE                                   | chr1:150581888-<br>150601599_strand=-<br> NONANNOT            |
| SEP252 | MSQKQEEENPAEETGEEKQDTQEKEGILPERAEEAKLKAKYPSL<br>GQKPGGSDFLMKRLQKGYFDSGDYNMAKAKMKNKQLPSAGP<br>DKNLVTGDHIPTPQDLPQRKSSLVTSKLAGGQVE                               | chr1:150595298-<br>150602077_strand=-<br> NONANNOT            |
| SEP253 | MSTGLRLAESRVPALEKQAQLEEQLRDKVLHEKDLSQQQMQ<br>SDLDKADLSARRVPGGCCMRQASLQKSDRAGPGSEASTEAE<br>GEGSGRQGPHERA                                                       | chr1:16905808-<br>16970994_strand=-<br> NONANNOT              |
| SEP254 | LLEITSSVIFSSFLQEAASEAYLVGLFEDTNLCAIHAKRVTIMPKDI<br>QLARRIRGERA                                                                                                | chr1:226256967-<br>226259277_strand=+ NONAN<br>NOT            |
| SEP255 | SRIVPLSLCFVYSECTKDGVELSPTAAANFTRRNLDCLRSRTPY<br>HVNLLLAGYDEHEGPALYYMDYLAALAKAPFAAHGYGAFLLSI<br>LDRYYTPTISRERAVELLRKCLEELQKRFILNLPFSVRIIDKNGIH<br>DLDNISFPKQGS | chr1:36064590-<br>36107159_strand=-<br> PSMB2:NM_001199780.1  |
| SEP256 | VFFCLSEDKKNIIIEEGKEILVGDVGTNNLYATFVKMLPYKDY<br>RYTLYDTTYETKESKEEDLVFIFWAPESAPL                                                                                | chr1:51623500-<br>51624038_strand=-<br> NONANNOT              |
| SEP257 | LCEHTRAGAVLYTRN                                                                                                                                               | chr1:91276134-<br>91276678_strand=+ NONANN<br>OT              |

|        |                                                                                                                                                           |                                                    |
|--------|-----------------------------------------------------------------------------------------------------------------------------------------------------------|----------------------------------------------------|
| SEP258 | MTSWPGGSFGPDPLLALLVILLARLILWSCLGTYIDYRLAQRRP<br>QKPKQD                                                                                                    | chr11:68925212-<br>68926307_strand=+ NONANN<br>OT  |
| SEP259 | MSYCFDRDDVALKNFAKYFLHQSHEREHAEKLMKLNQRGG<br>RIFLQDIKKPCDDWESGLNVMICALHLEKNVNQSLLELHKLAT<br>DKNDPHLCDFIETHYLNEQVKAIKELDHVTNLHKMGALESGL<br>AEYLFDKHTLGSDNES | chr11:77445415-<br>77445967_strand=-<br> NONANNOT  |
| SEP260 | FSPDQLQGEPSGNRQESRRSAGVQAGSHHRVHGAEASIQAGIY<br>ATRSGGTLVLVGLGSEMTTVPLLHAAIREVDIKGVFRYCNTWPV<br>AISMLASKSVNVKPLVTHRFPLEKALEAFETFKKGLGLKIMLKCD<br>PSDQNP    | chr15:45117467-<br>45154252_strand=-<br> NONANNOT  |
| SEP261 | VERSAAETVTRGGIMLPEKSQGKVLQAIVVAVGSGSKGKGGEI<br>QPVSMKVGDKVLLPEHGGTKVILDDKDYFLFRDGDILGKYVD                                                                 | chr16:74646473-<br>74646748_strand=-<br> NONANNOT  |
| SEP262 | SPPTNLTFISILTKQSVVIPHIWSSSKPVSGDTRLRYGWIF                                                                                                                 | chr18:32947243-<br>32947540_strand=+ NONANN<br>OT  |
| SEP263 | GNAICIQTPGLRGQRRDPPLPPVPEAGSGAGDKPGPARGLGFR<br>DPLVLEGPRAPERQGSQGHGDQRARNLRRRGLEAGSARSGSF<br>CPSVLGDRTAPGR                                                | chr19:49458275-<br>49460071_strand=-<br> NONANNOT  |
| SEP264 | MDKPCGCPPGVCDHGTGDRRDPWYSTVGLLPPVRAMSQRNL<br>NAKTEQGPTGVTMTSNPITWGQIKKTTQEAELLERQGGQAKT<br>PDSMFLAMLAVVSCASIGSGEPPTGN                                     | chr19:58816741-<br>58827140_strand=+ NONANN<br>OT  |
| SEP265 | MGKGSFKYAWVLDKLAECEHGITIDTSLWKFETSKYYVTIVDA<br>PGHRDFIKNMITETSQADCAVLIVAAGVGEFEAGISKNGQTQE<br>HALLAYTLGVKQLIVGVNKMDSTEPYPYSQKRYEENC                       | chr2:107313599-<br>107315077_strand=-<br> NONANNOT |
| SEP266 | GLWISHNKHTKLLKSAKKKCNQHILSDVWVPLTSVFYIEILNS<br>PEKACCLAKTAFDEAIAELDTLSEESYKDSMLIMQLLRDNLTLWT<br>SDTQGDAAEAGEGGEN                                          | chr2:127314648-<br>127315784_strand=-<br> NONANNOT |

|        |                                                                                                                         |                                                            |
|--------|-------------------------------------------------------------------------------------------------------------------------|------------------------------------------------------------|
| SEP267 | GIKQGVPDFKGTSAQAQIYII                                                                                                   | chr2:242272175-<br>242277881_strand=-<br> NONANNOT         |
| SEP268 | MQIFVKTLMGKTITLQIEPLDTTENVKAKIQDKEEIRLDRQTLMF<br>DGKQLEDERTLSNYNIQKESTLHLVLRLCDVIKEEFLYNSQEE                            | chr2:48109321-<br>48110972_strand=+ NONANN<br>OT           |
| SEP269 | MLVRVVLNSQPQVICPPQPPKVLGLQA                                                                                             | chr2:61275508-<br>61277771_strand=-<br> NONANNOT           |
| SEP270 | MSLRNLWRDYKVLVVMVPLVGLIHLGWYRIKSSPVFQIPKNDD<br>IPEQDSLGLSNLQKSQIQGK                                                     | chr20:10385838-<br>10414846_strand=-<br> MKKS:NM_018848    |
| SEP271 | MSGSCQRSGEDKKQEEEATAACGRLAGVPEAKQGPKADSDSD<br>LETGARGRGQARLLPLGASPAGVVGGLAPRRQETSVQQG<br>T                              | chr22:21368073-<br>21368526_strand=-<br> TUBP3FP:NR_003608 |
| SEP272 | MAPWSREAVLSLYRALLRQGRQLRYTDRDFYFASIRREFRKNQ<br>KLEDAEARERQLEKGLVFLNGKLGRII                                              | chr22:39898321-<br>39914136_strand=+ MIEF1:N<br>M_019008.4 |
| SEP273 | MQKEDPHVTHLQVAQDTVPEAAQISSEHPQEKQA                                                                                      | chr3:75673790-<br>75674212_strand=-<br> NONANNOT           |
| SEP274 | QEKLKLEAELGNMQLLEDFKNKYEDEINKRTGMENEFFLIKDD<br>VDKAYMTR                                                                 | chr5:60040072-<br>60040365_strand=-<br> NONANNOT           |
| SEP275 | MQASIEKGGSLPKVEAKFINYVKNCFRMTNQEAIQDLWQWRK<br>SL                                                                        | chr5:93018209-<br>93019492_strand=-<br> NONANNOT           |
| SEP276 | LPDHLNSRLEESLVMQEEVWRKGN                                                                                                | chr6:127588051-<br>127664224_strand=-<br> NONANNOT         |
| SEP277 | MIKGVTLGFHYKMRSVYAHFPINVVIQENGLVEIRNFLGKKYIR<br>RVWVRAGVVCSVSAQKDELILEGNDIELVSNSAALIQQATTV<br>KKKDIREFLDGIYVSEKGTGQQADE | chr6:64325724-<br>64326136_strand=-<br> NONANNOT           |
| SEP278 | RVGAELNLWLLKLHWLALDVLSNPLDFVVVVVLFVCFRLAA                                                                               | chr6:80253441-<br>80254311_strand=-<br> NONANNOT           |
| SEP279 | METLQSETKTRVLPWLTAQVATKNVAPMKAPKRMRAAVP<br>VAAARCDSSGQKTPANLTPCDKDCVLHE                                                 | chr7:134844506-<br>134855399_strand=-<br> c7orf49:MRI-2    |

|        |                                                                                                                                                                |                                                            |
|--------|----------------------------------------------------------------------------------------------------------------------------------------------------------------|------------------------------------------------------------|
| SEP280 | MAEALNKYKLSVKGKAQLGVQAFADVLLVIPKVL AQNSGFDLQ<br>ETLVKI                                                                                                         | chr7:65216074-<br>65234525_strand=+ CCT6P1:N<br>R_003110.2 |
| SEP281 | CGITASSPLSVKGNTFGYLLKLLIITVLPNCT                                                                                                                               | chr7:91826459-<br>91831812_strand=+ NONANN<br>OT           |
| SEP282 | MMMHSLQRGTFKQNTSRQLQRLDSEAKLEGLRKDEEPPLREE<br>AAAAAAAAAATPPLPHLPGNNAASDIQAVRWELLQTHAQHE<br>GAEATGCDGHQPGAEPGPGGPHP                                             | chr8:38001128-<br>38009539_strand=-<br> STAR:XM_005273620  |
| SEP283 | MRKKQQIENASKRNKWKLSTKQHVIYSNKKYISFWAQSINPVT<br>EKRIQVEQTRDEDLDTDSL                                                                                             | chr9:15470968-<br>15475652_strand=-<br> PSIP:NM_021144     |
| SEP284 | KNSLLDLTPLPSSDTRLLSSQRS                                                                                                                                        | chrX:44168529-<br>44172000_strand=+ NONANN<br>OT           |
| SEP285 | MVEITSKHEERQDEHGYISRCFTRKYTLPPGVDPTKVSSLSPEG<br>TLTVEAPMPKLATQSNEITLESRAQLGGLGAAKSDQSAK                                                                        | chrX:49089935-<br>49090674_strand=-<br> NONANNOT           |
| SEP286 | LQLETEIEALREELLFMKNHEEEVKGLQAQIASFRLTVEVDAPKS<br>QDLAKIMADIRAQYDDLAKNREELDKYWPQQFEENTTVVTT<br>VRRGWSC                                                          | chrX:91714698-<br>91716013_strand=+ NONANN<br>OT           |
| SEP287 | MMMGCGESELKSADGEEAAVPGPPPEPQVPQLRAPVPEPG<br>LDLSLSPRPDSQPQRHGSPGRRKGRAERRGAARQRRQVSGGG<br>WPPARDGLAPTWSLPCPLLPGPLPPDAALPGAVRAAACGAAG<br>AGDARAEQPLGPGAAGRSREPL | chr7:100032991-<br>100034106_strand=-<br> NONANNOT         |
| SEP288 | MAAGRGRGRADGAGERDAADCAARRAEVAESRAAPGALPEA<br>AVGPRGPSRGRGEAAGLGLGLAALKLRAGAGARGGSGARGGG<br>ALPARLHLQGLRD                                                       | chr9:139256352-<br>139264369_strand=- DNLZ                 |
| SEP289 | LGAGAVGSQTRLSASSHFSQGGCACAQLPGRAGRRGLKSLVPS<br>LERERRAPQTSVPASGEEAGKKDAASGEHPGSKTGPLSTVGS<br>VTRLGKAGAPAVGLLLANERSPRRRRGANDPTQDGE                              | chrX:16859470-<br>16888534_strand=- RBB7                   |



|        |                                                                                                                                                          |                                                           |
|--------|----------------------------------------------------------------------------------------------------------------------------------------------------------|-----------------------------------------------------------|
| SEP290 | ECLAGSGFRVRPCSGFARSSAPAGNQAPSEARTAPGARTGGH<br>AVPEGGGRGSRGGGGGGRGGRQLPPAAAVGDAGQLGRGG<br>PAGGPDRRDAAAGRGAGQPGLAVRAPGGAAAGPGAPGCGG<br>AGGQGPAPGGAAAAAARFG | chr10:99092201-<br>99094454_strand=- FRAT2                |
| SEP291 | MATPGLQQHQPPGPRHRWPPPPGGAAPAPVRGMTDSPP<br>PGHPEEKATPPGGTGHEGLSGGAADVASGVGSRHRARLPAR<br>P                                                                 | chr9:139557342-<br>139567132_strand=+ EGFL7               |
| SEP292 | MGSGCRCGGATSRRRTPSWTPSSASLRARAVSSSPTLGWRTA<br>PSSTATTASASCAATRGRPR                                                                                       | chr7:150646564-<br>150675053_strand=- KCNH2               |
| SEP293 | MRLVARLQVGPADTQPRVSGEADGESSGSRDSGLLWCHQPP<br>PQQGGPGEGQEQLQRLDVQTDGGPVCAPVDRWPVLPRED<br>QEGQQL                                                           | chr9:123611620-<br>123639498_strand=- PHF19               |
| SEP294 | MSLFDENELLRSHWYLYWGNIAKQEAYSLGENFFMSETENS<br>CSRLCHPFFSRQKIPKSCNQSLHLIDKATNPKCLSMSTAACQT<br>SSIATRCPV                                                    | chr14:103799905-<br>103808641_strand=+ EIF5               |
| SEP295 | SGQHGRAAAAAPCPPPGSRPGSSAAVGPRPGLESRVPRQARE<br>GAAVHGQQASGGPRRGWRPSSAELTIETANPYL                                                                          | chr16:89574814-<br>89623783_strand=+ SPG7                 |
| SEP296 | ITQARLSGQHGRAAAAAPCPPPGSRPGSSAAVGPRPGLESRV<br>RQAREGAAVHGQQASGGPRRGWRPSSAELTIETANPYL                                                                     | chr16:89574814-<br>89623783_strand=+ SPG7:NM<br>_003119.3 |
| SEP297 | RGEEAEPRSAAGGWGRKSEVSADVRVESGRSRLGAEVRLG<br>SLSAIVDPRSREREGEEERASGKDGPLPPTPEREALILGSQRTAA<br>AAAAGTITRPRATANCCECTGRGPGSGGGGSRVAVKNVSH                    | chr8:64080459-<br>64125260_strand=+ YTHDF3                |
| SEP298 | PSPPSAAAGARAAHPHHAQVHPAVALQPARGVGGQAALFAA<br>GRAGGDLPLQPQPGGAAARRQPAARAAQAFFPAAELAQAGP<br>ERQRDPAVASRGGQLHAAGGAGRVPERYP                                  | chr8:144873093-<br>144897592_strand=- SCRIB               |

|        |                                                                                                                                                            |                                                                   |
|--------|------------------------------------------------------------------------------------------------------------------------------------------------------------|-------------------------------------------------------------------|
| SEP299 | ERAVTATAAAEEAAAAGPGPVRLSAPRGCESAAAEAAAAEEAAA<br>GGGVGEPAPGRRGAEDEAAAWRSWRGGRRAVAAAAAAAP<br>DPGGRARTHVSR                                                    | chr10:98277876-<br>98346768_strand=- TM9SF3                       |
| SEP300 | AGLGCDRRLRLFFGRVVGASGRLGRVHAAWRRRLIPPSTPGSSD<br>VGQLCAGACDPRGGLGAASIAADGAPRGPGEYQPGKGSARPT<br>TADPGRAGGTEVREPAGSSAAAEAEDETGCTP                             | chr4:122734431-<br>122745077_strand=- CCNA2                       |
| SEP301 | PSPRNVTSSSEAWSSPKLGRKRKKKSQKKFSFLESQTRCGTEEG<br>VKARGSLQDRCLSPFPGHVGAHLAAPEAAGARQSPSGEGD<br>PPRHPGATTGPRSSTPAPPQGQFLPPSI                                   | chr7:100464771-<br>100471014_strand=+ TRIP6                       |
| SEP302 | MKSREGSVHPQVEIANLLLIQSSLANLLSLQDPAGFALLALKWK<br>NIWWSTSAHIATLPWPKEAYLMTMSSSCLLDTTSQWWSFQQ<br>RW                                                            | chr10:101992050-<br>102027406_strand=-<br> CWF19L1:NM_001303407.1 |
| SEP303 | MPSVPKELSSAELPPQPAAGQYGPDSADAPNPWSREPRDRS<br>GHLSQTPRSPEALLRGRRRGHLCGVPRIQEPQTAQRGAIGGGG<br>AGVQQQTAGARGTTEEAPGGSAAEDESQGGEASDRTEEPDEV<br>AGSGGLGVWATDTVSG | chr5:180650039-<br>180662529_strand=+ TRIM41                      |
| SEP304 | MAPPALQRGQRVAAVAVGSQAVLQILSRVSGRQAPPQPSGSG<br>GVGAGPVVVPDGGGEGPQPHSSSQSPPDLPLKAK                                                                           | chr19:42701592-<br>42724264_strand=- DEDD2                        |
| SEP305 | MSAPYSAAPPESAPPSPAPKTSRSPPPPGPSQTPDFSRNPPLV<br>QDTVSGKGWPTSRSRFPPRERGDPGDSSGQEVPAASRPHQARN<br>VRLWESALCIATAPEPQAPSEPTQI                                    | chr1:150521860-<br>150532550_strand=+ ADAMTS<br>L4                |
| SEP306 | ALQYQTAFGKWYESLLNRLIVSKQHVLTLKLNGRITILACGNLT<br>GMNYLKKLKMKSLMKLSV                                                                                         | chr3:193310939-<br>193412467_strand=+ OPA1                        |
| SEP307 | MAVAGAAAGAGRRRTRMVPEPGDHAGVAAGEAAGRRAEAS<br>GEGAAHRRVHGQDATDDCELA AAAAGELGEGPG                                                                             | chr19:13058987-<br>13068000_strand=-<br> GADD45GIP1               |

|        |                                                                                                                                    |                                                            |
|--------|------------------------------------------------------------------------------------------------------------------------------------|------------------------------------------------------------|
| SEP308 | KNTTQESLEKGPPSVLKGGRSRSRCPRTTRTS                                                                                                   | chr22:41697661-41756143_strand=+ ZC3H7B:X<br>M_011530016.1 |
| SEP309 | MERAELPQTAGQAGRGSPLPSRPPSPGLESPAPAPVPHR<br>LPRRPRALPCPPSALR                                                                        | chr11:118964582-118972602_strand=- H2AFX                   |
| SEP310 | CCLKGTWYPNKAGNLILLQGHTV                                                                                                            | chr3:124944633-124949368_strand=- ZNF148                   |
| SEP311 | MLRYCFFPKMCFSTTIGGMNQRGKRK                                                                                                         | chr12:48732236-48745011_strand=- ZNF641                    |
| SEP312 | MDHQPGQTAKASEIQSTGGQRDPQPERERPANSLIDQCSQRD<br>HQTEPPKDRHLC                                                                         | chr2:131113651-131132956_strand=+ PTPN18                   |
| SEP313 | AVFFKNLLAFARSMISDASHIY                                                                                                             | chr6:80194734-80199064_strand=- LCA5                       |
| SEP314 | MRSSFVLWERPALGEWVSSQPTSHLPSALCFLGFFPPVFLKTS<br>LSLAELSFLNRSAFAIDPGQVKISF                                                           | chr16:86563765-86575431_strand=- MTHFSD                    |
| SEP315 | MEGVFPSVKLTTWLPSCEDLTPGGGRGLTPSIIAVTLPSLVVSL<br>GSVC                                                                               | chr7:158799383-158814542_strand=+ LINC006<br>89            |
| SEP316 | MADRAPRQPTSLGSSPQRCGSPSAPPPPPDRGERIEDCLAPLC<br>PPVVGRRGGCALSRLFVDSLRLSSRTAAVELVAGGVCRRSPQ<br>EN                                    | chr1:155532795-155708399_strand=+ ASH1L-<br>AS1            |
| SEP317 | LVLFSFSASWLTVLPSSLSSYGACSRFYALIFLHKRYRSVVKLGIPL<br>QCLLCAGLRVGVINNGLEASSP                                                          | chr17:35441928-35444379_strand=+ ACACA_an<br>tisense       |
| SEP318 | MGGETDGAGRTRDGADGGGGAGSAGQIQRKSGGSAQGCEA<br>GAPRGPSGTQEMGPLSRTQERSHGASGLAGDGAHARGLLAP<br>QHPAPRLQGDPRAPGRPLP                       | chr19:3610043-3626771_strand=- CACTIN                      |
| SEP319 | DQRSPGNCLIGKTFLTGGAPEAARRNQRGDAAAGAGPRAAAA<br>DGAGAEGAGGAEGQNRGADGSAAPKRAGPGQQWSRAPEPG<br>AVLAPAEVVLRAVWGVRRGLPVPARGEHCGRGTPERPQVN | chr22:46973128-47073068_strand=+ GRAMD4                    |
| SEP320 | MAGRARSVQIILQESQTTTFTSPPAGQHRLVSGSPSAETLPLR<br>WGLDAREPFSAKSLKRSEAAPRNRGGSEASPATLQTGPPPRPP<br>SPQS                                 | chr5:34914296-34925392_strand=+ NONANN<br>OT               |

|        |                                                                                                                                                       |                                                     |
|--------|-------------------------------------------------------------------------------------------------------------------------------------------------------|-----------------------------------------------------|
| SEP321 | DAAIRHSYKTSSGSCFKCQKSGHWAKECPQPRIPKPCPICAGT<br>HWKSDCPARPTATPGAPKALAQGSLTPSQIYSA                                                                      | chr22:17092426-<br>17095991_strand=+ NONANN<br>OT   |
| SEP322 | RSSSSQVEERKRQREEDAGGGGGERPLPGVGSRRGGAGPPGAP<br>GCGGPHGRRPAPRAPPELAPGPPAAADARRGAALGRDRRRDS<br>GQRPASRLSAPQPGPDILQAPARGELPGAERLGS                       | chr19:54693858-<br>54697432_strand=+ TSEN34         |
| SEP323 | VLLKNEQTELLYNKSQPF                                                                                                                                    | chr12:118649944-<br>118650075_strand=. NONANN<br>OT |
| SEP324 | RKRRRRRRTPCRPKRPLSRRSGVKFKILEDLPPSSSRPQS                                                                                                              | chr2:85132483-<br>85133801_strand=+ TMSB10          |
| SEP325 | MPPKFDPNKIVGACSGCGRGCMEHPSALPRVQSFPRLMGLL<br>KPLPPRDLPGVAPRPSLSLSP                                                                                    | chr9:130209955-<br>130216851_strand=-<br> NONANNOT  |
| SEP326 | MSRGTMPQPEAWPGASCAETPAREAAATARDGGKAAASGQ<br>PRPEMQCPAEQTEIKRSS                                                                                        | chr5:14664778-<br>14699800_strand=+ NONANN<br>OT    |
| SEP327 | GRGPTAPAVRDPNAIPAQRSHGSYRQHERGGPRGRDPQPETQ<br>RSSCTARAQHGVHSNTASPLPAGAPRATAEIPQ                                                                       | chr7:150778172-<br>150779835_strand=- TMUB1         |
| SEP328 | MVALPPAGPEAEAGAAELHVQTRSETALLALDRPLLPPALRRP<br>QTAQPGGMEARKQGGFVQVSANALAVTGLGSPQSGGAATLA<br>AQARLQPVHLDVWGEHERGRCGGPASLPQPQRVLPQAQAEAA<br>GPACLWPAQRD | chr22:32014539-<br>32021921_strand=- PISD           |
| SEP329 | GEEGWGGCGGRGAPPGRKLNINQSIAVSTATQRRRGCEGGRG<br>TGEGRVGGREEGRGRGESAVGAG                                                                                 | chr2:200322928-<br>200323580_strand=+ NONAN<br>NOT  |
| SEP330 | TRAGQGEPASEAQPLSEPGPQTPEPEPRPAQPGAERLPG<br>QATTQQTFDQRR                                                                                               | chr19:56165091-<br>56185542_strand=+ U2AF2          |
| SEP331 | CCYVDGQQQANKLVSAVLAGKEVLKNGHSPGAVARTFKIPAL<br>WEAEAGGCLSTGV                                                                                           | chr1:7863564-<br>7864928_strand=- NONANNOT          |
| SEP332 | MPEPSLGESHSPHLPQPQPKPAVAAAATLHLPAAPEGPHRQQQ<br>QAGSPAP                                                                                                | chr7:100169852-<br>100183655_strand=- LRCH4         |

|        |                                                                                                                                                  |                                                      |
|--------|--------------------------------------------------------------------------------------------------------------------------------------------------|------------------------------------------------------|
| SEP333 | SPGEEDGPAGCVSHHRGAQELIGASLHTARCDPRRGPQFQQL<br>QQQAAGPGGLPGHSHGRRQRAPCLPRGCQRQCGLGCFWH<br>GQPGGGGHHGGGGRGRGRRRRLCDGGVPGHTQPWGS                    | chr1:228544743-<br>228549628_strand=+ OBSCN          |
| SEP334 | HGVRHPAWAFRLCLPCPSRRVTTSARTQQKGQDTQRRWRTH<br>LGTEGQCDLPGAGGPARAFPEETAKEPRPGTAEKQGGGRRGP<br>VPSSSAVPGGRSARLSA                                     | chr10:11925853-<br>11937442_strand=- PROSER2-<br>AS1 |
| SEP335 | GACVGLATRLANPPRPARPPRLRTPEVPTRTSDAPRPSATPPGA<br>DPLNSAGPGARGPHDPRAPARTPRAPAPARVPDAAPATHRA<br>PQQGPEPPAAGRGGAPR                                   | chr19:55737961-<br>55770381_strand=-<br> NONANNOT    |
| SEP336 | MCCVKLVTSWDGQNPPRSRLKFLWPYKVVISLGLQKLALERQ<br>APLLCPF                                                                                            | chr12:12966292-<br>12982381_strand=+ DDx47           |
| SEP337 | GRKRGEFGERRGLGDTEPSGAGAGAQAQKKAAPGPTAAAAA<br>QASAAAARRQPREPLGSRPPAQPPPPREPVAGSRSGRKTTEGPS<br>VRATPRGPNEQPEAAAAEDGSDDAEAEKGTGPAP                  | chr2:231577583-<br>231685792_strand=+ CAB39          |
| SEP338 | AWHPSSSVFPSLACDPPFPLSHLPLLEASGGIYKKRLLIPPEKS                                                                                                     | chrX:5214450-<br>5216144_strand=+ NONANNO<br>T       |
| SEP339 | FGQCQSYVGVTSAAEETTGSRITCSPTTDSYGIPQGCKKK                                                                                                         | chr1:175913967-<br>176176388_strand=- RFWD2          |
| SEP340 | DYILSLEMFSILLWGFGINVSSLIMELLFPEAS                                                                                                                | chr3:88101102-<br>88108113_strand=- CGGBP1           |
| SEP341 | FFHPETAVAGARTEAAAGARLASGLRVGPAEPDAAPGAGRWW<br>CLAASGPPRAATSEPSATAGVRRRAAGPAGPGARSCPPGRGGA<br>DQNNVQHQPPEPEGVHQQSASPGGLHDQRKRHGHSPDP<br>GLLLQNQGD | chr7:66386203-<br>66420643_strand=+ TMEM248          |
| SEP342 | VLKCVCAASVHDASSPLGPPRVHFLDHTHIPPKNYLWWVVVY<br>SSRLLGVIVPQNM                                                                                      | chr16:87435666-<br>87438903_strand=-<br> NONANNOT    |

|        |                                                                                                                                                                       |                                                    |
|--------|-----------------------------------------------------------------------------------------------------------------------------------------------------------------------|----------------------------------------------------|
| SEP343 | LIPAHTAHVEFACLVVYVLDLITDACTIKPLFNKVLQNDNAFPKI                                                                                                                         | chr9:130128866-130129660_strand=+ NONAN<br>NOT     |
| SEP344 | KRNKKKKKFWTRCSWEGSCPGGRPGNEHRPAAGREPGRASP<br>GEAGPAGGAAAGQGAPREGPVPAADAKRPGQG                                                                                         | chr1:16905808-16970994_strand=-<br> NONANNOT       |
| SEP345 | MPARRLLLLLTLPLGLGVSDRGAWGGGQLATAGSGPGQRRG<br>AGAGVRAGSATAAARCPVSPAVGGSGRA                                                                                             | chr17:62205639-62207524_strand=-<br> NONANNOT      |
| SEP346 | TASKNIKQYLQIQGEKHTSTIVVGAFNDRTEKTDTEVLINTMSKL<br>KI                                                                                                                   | chr1:4036227-4073316_strand=+ NONANNO<br>T         |
| SEP347 | MEWWGQCMTEENSRQKGLFQKKKVYKWLLCNVERCSPILVI                                                                                                                             | chr1:157243513-157253900_strand=+ LOC1053<br>71455 |
| SEP348 | DLKPVFLLLLSIRDQCADLAVERRLWAASLEA                                                                                                                                      | chr11:3532972-3542051_strand=+ NONANNO<br>T        |
| SEP349 | MRSWAKRGLATCLRSYSQHCLILKPMNKVAFIPTEAWYSAGR<br>QTHKQVQLAHLASRSASMDSTKNGFKILGKKQIIKQLKNTNFKI                                                                            | chr11:82783129-82805398_strand=+ NONANN<br>OT      |
| SEP350 | MLHSRKRELRQVLITNKNQVRLTLLTLG                                                                                                                                          | chr11:65266554-65273981_strand=-<br> NONANNOT      |
| SEP351 | MCLKSVMLTWGPGCPWAGADGTSTLIKFLLAPEENKVTLPLL                                                                                                                            | chr16:3054772-3058645_strand=+ NONANNO<br>T        |
| SEP352 | NHESFLNSVYRQVRIFLSEPERIKGGFELDKIELKVQTNGGRIVKI<br>LQRIPCVVILTFFKVLHGFSVNKKLK                                                                                          | chr19:23278060-23286908_strand=+ NONANN<br>OT      |
| SEP353 | NLGSPRRIRRIWSPRLWKTLPMMGMIRNGER                                                                                                                                       | chr2:107137814-107160732_strand=+ NONAN<br>NOT     |
| SEP354 | QHSDKGSSQSKVNLEQVNEETLKTGGLRKMHPLRACSEGSAEL<br>IQGKEILPQTIDHSFNLSHESLLQLLVRGNCRFILDHLCNITEFSN<br>ALWLRQLYNQLDVVLSDTTLSHFQFCFPVFLFSFSLFLSYIKL<br>KNVFICCHRQIYMNQVDQETK | chr3:107852804-107857456_strand=+ NONAN<br>NOT     |
| SEP355 | VHCQMSSNILKEIFLSEQHVSAMSLKYSVNQGINRCAVPRLLCS<br>YRAQEE                                                                                                                | chr15:31059077-31065344_strand=+ LOC10028<br>8637  |

|        |                                                                                                             |                                                          |
|--------|-------------------------------------------------------------------------------------------------------------|----------------------------------------------------------|
| SEP356 | PATAACFCTAWQAKNGFHIFEYLKKIFQEYHFVAHENYMKFKF<br>QCPQIKFYRNIACSLI                                             | chr21:35345400-<br>35353552_strand=+ NONANN<br>OT        |
| SEP357 | TIARTKNQTPHILTHRWELNNEITWTQEGEHHTLGTVVGWGE<br>GGGIALGDIPNAR                                                 | chr1:144672440-<br>144676693_strand=+ LOC1053<br>76128   |
| SEP358 | SRLSATSASWVQAVLLDQHQRP                                                                                      | chr6:141167105-<br>141170052_strand=-<br> LOC102723724   |
| SEP359 | TYKIKDFKTFTISSTAIYYELQRGTRSTEGA                                                                             | chr1:995566-<br>1002621_strand=+ NOTANNOT                |
| SEP360 | MGEMERGEIKEKKVIPET                                                                                          | chr17:41380977-<br>41381147_strand=- LINC00854           |
| SEP361 | GRPSPSLAAALQFDLRLLC                                                                                         | chr1:61105899-<br>61106128_strand=-<br> NONANNOT         |
| SEP362 | VASGIWWGLCISLPPQLGIGLCCFTSSTSGAPGDCHSLPCDLQ<br>VLGDAQLRCQDILEAGKRDGVSLLLPRLECIIPISAYYNLRPGSS<br>DSPTSAS     | chr19:23449149-<br>23457064_strand=- IPO5P1              |
| SEP363 | MRTASPYSRPEGGQKADSLQAARPLHRPHRPRTRQLRTEPSP<br>SRGCR                                                         | chr2:66649993-<br>66662138_strand=- MEIS-AS3             |
| SEP364 | AHHCPVGSPFWAGQQSRLPNVEGGVEGEAPVGTGAARSVC<br>RPAGVPGGRGLGGRTRSRRLARPAPGNEGLSTWASGWGGC<br>TGAPSSASPLALRSISHQG | chrX:118466927-<br>118467907_strand=+ LOC1019<br>28336   |
| SEP365 | MGDQPCASGRSTLPPGNAREAKPPKKRCLLAPRWDYPEGTPN<br>GGSTTLPSAPPPASAGLKSHPPEK                                      | chrX:56755414-<br>56843979_strand=+ LINC0142<br>0_NoBody |

---

**Supplementary Table 2.** Detected microprotein peptide sequences from human interactome data<sup>1</sup>.

| <b>Detected peptide sequence</b> | <b>SEP #</b> |
|----------------------------------|--------------|
| LAGRDEGGQSGQK                    | SEP247       |
| DEDLDTDSL                        | SEP283       |
| CQDILEAGKR                       | SEP362       |
| MQASIEKGGSLPK                    | SEP275       |
| EAVLSLYRALLRQGRQLR               | SEP272       |
| DAASGEHPGSK                      | SEP289       |
| MADDKDSLPLK                      | SEP71        |
| LDRQTLMFDGK                      | SEP268       |
| YWTVQNVEMKHKR                    | SEP153       |
| GTRPEDSSVLIPTDNSTPHKEDLSSK       | SEP215       |
| MQASIEKGGSLPKVEAK                | SEP275       |
| EFLDGIYVSEK                      | SEP277       |
| MTNQEAIQDLWQWRK                  | SEP275       |
| SVCRPAGVPGGRGLGGPR               | SEP364       |
| EPSGAALR                         | SEP2         |
| GPTIQTNLK                        | SEP232       |
| IVVDELSNLK                       | SEP215       |
| TLSNYNIQKESTLHLVLR               | SEP268       |
| QVEGTGTPK                        | SEP61        |
| GRPSPSLAAALQFDLRLLC              | SEP361       |
| SLLTPDVNFK                       | SEP146       |
| EGSSGPEAPK                       | SEP164       |
| TKYLCNYLITLVNR                   | SEP7         |
| DNLTLWTSDTQGDEAEAGEGGEN          | SEP266       |
| YPSLGQKPGGSDFLMK                 | SEP252       |
| QDEHGYISR                        | SEP285       |
| SVYAHFPINVVIQENGLVEIR            | SEP277       |
| RGCEGGRGTGEGR                    | SEP329       |
| NILDELKKEYQEIENLDKTK             | SEP215       |
| CDSSGQKTPANLTPCDK                | SEP279       |
| LQKAVVRVRVTIKKKKYK               | SEP82        |
| LLPLGASPAGVVGGGLAPRR             | SEP271       |
| YAWVLDKLLK                       | SEP265       |
| QVQLAHLASRSASMDSTKNGFK           | SEP349       |
| SVCRPAGVPGGR                     | SEP364       |
| TEMLSESKNILDELK                  | SEP215       |
| KCLEELQKR                        | SEP255       |
| EHALLAYTLGVK                     | SEP265       |
| YYTPTISR                         | SEP255       |



|                                                  |        |
|--------------------------------------------------|--------|
| YIWSSRSRRLSSEPAEKQKGETNT                         | SEP189 |
| FLDGIYVSEK                                       | SEP277 |
| RWRTHLGTEGQCCLPGAGGPARAFPEETAKPR                 | SEP334 |
| RAAGPAGPGAR                                      | SEP341 |
| GGLGAASIAADGAPR                                  | SEP300 |
| PAGVPGGRGLGGPRTRSR                               | SEP364 |
| QKDELILEGNDIELVSNNSAALIQQATTVK                   | SEP277 |
| ADSLQAARPR                                       | SEP363 |
| PVSDGTSTLSPR                                     | SEP3   |
| GPVPSSSAVPGGRSAR                                 | SEP334 |
| TRDGADGGGGAGSAGQIQRKSGGSAQGCEAGAPR               | SEP318 |
| FSFILNFPLSR                                      | SEP123 |
| TADGCELPR                                        | SEP187 |
| DELILEGNDIELVSNNSAALIQQATTVK                     | SEP277 |
| FCLSNDFFKSIYIGIFQNSNCHIKKHDNLNDLNKNTVPKIKRQL     | SEP214 |
| MKFLDLTLALRIQDGNYNHEDR                           | SEP31  |
| DETSPADAVCPGLGRDLCGSSRCCLR                       | SEP2   |
| DGYELSPTAAANFTR                                  | SEP255 |
| EPGRASPGEAGPAGGAAAGQGAPR                         | SEP344 |
| SADGEEAAVPGPPPEPQVPQLR                           | SEP287 |
| KLNINQSIQVSTATQR                                 | SEP329 |
| KYKGRKER                                         | SEP82  |
| RPTWSRCGTNK                                      | SEP166 |
| GAWGGGQLATAGSGPGQR                               | SEP345 |
| GAGAGPHLGPQVEGGLQQVQR                            | SEP178 |
| GRGPTAPAVR                                       | SEP327 |
| TLRDYLQLLR                                       | SEP71  |
| MGETDAGRTRDGADGGGGAGSAGQIQR                      | SEP318 |
| LPNVEGGVEGEAPVGTGAARSVCR                         | SEP364 |
| NGIHDLDNISFPK                                    | SEP255 |
| VFFCLSEDKKNIIIEEGK                               | SEP256 |
| DGLAPTWSLPCPLLPGLPPDAALPGAVR                     | SEP287 |
| KYEDEINKR                                        | SEP274 |
| IIPALLEADEGYPFVRSWR                              | SEP161 |
| QHGGSSK                                          | SEP95  |
| ATANCCECTGRGPGSGGGGSRVAVK                        | SEP297 |
| EFDLLSKVFQTLK                                    | SEP162 |
| HGTESLPARGP                                      | SEP235 |
| GRAEWGWAPAGHQGLR                                 | SEP208 |
| IMADIR                                           | SEP286 |
| RKGVLTGTEPAR                                     | SEP235 |
| ADAPAVSPESPQKKPPFQPRSVQEAPCSPQGPPAQRPALAPPSKPSLK | SEP42  |
| PAGVPGGRGLGGPR                                   | SEP364 |

|                                                      |        |
|------------------------------------------------------|--------|
| MAVAGAAAGAGGR                                        | SEP307 |
| STLLNNHIIKIIARKWTIFTMFCKLASVWICTLLVKYI               | SEP233 |
| QLPSAGPDK                                            | SEP252 |
| FILNLPTFSVR                                          | SEP255 |
| ERAVELLRK                                            | SEP255 |
| ERSCLHSIK                                            | SEP80  |
| EDHDHIPPEAVHR                                        | SEP224 |
| KEKDTLLEVLK                                          | SEP51  |
| QDLKWTLLVCGIE                                        | SEP191 |
| PGVALSSLPR                                           | SEP244 |
| RDAAAGRGAGQPGLAVR                                    | SEP290 |
| PRRGGEQPHHAAPAQEAEEKEGRAR                            | SEP150 |
| FIAIIAYIKKEK                                         | SEP112 |
| AEPLQTAGQAGR                                         | SEP309 |
| GRDPQPETQRSSCTAR                                     | SEP327 |
| VRFAHATPEAVSG                                        | SEP116 |
| TAPGARTGGHAVPEGGGRSRRGGGGGGGR                        | SEP290 |
| TAFDEAIAELDTLSEESYK                                  | SEP266 |
| TRMVPEPGDHAGVAAGEAAGR                                | SEP307 |
| PSPPSAAAGAR                                          | SEP298 |
| GLVFLNGK                                             | SEP272 |
| AEEQPGLGPGAAGR                                       | SEP287 |
| EALILGSQRTAAAAAGTITRPRATANCCECTGRGPGSGGGGGSRVAVKNVSH | SEP297 |
| NEQTELLYNK                                           | SEP323 |
| RQVSGGGWPPAR                                         | SEP287 |
| GPGSGGGGGSRVAVK                                      | SEP297 |
| EYQEIENLDKTK                                         | SEP215 |
| TITLEVEPSDTIENVKAK                                   | SEP210 |
| RKKIEKRKSFR                                          | SEP82  |
| DPQPERERPANSLIDQCSQR                                 | SEP312 |
| RTGMENEFFLIK                                         | SEP274 |
| TFLTGGAPEAAR                                         | SEP319 |
| IVVDELSNLKKNR                                        | SEP215 |
| AAALDPTR                                             | SEP224 |
| PEDSSVLIPTDNSTPHKEDLSSK                              | SEP215 |
| IIDKNGIHDLDNISFPK                                    | SEP255 |
| ASEIQSTGGQRDPQPERER                                  | SEP312 |
| HPQEPGIAGGGGER                                       | SEP157 |
| IPLSIVIRK                                            | SEP116 |
| SFSGNPAVEEGTTQEN                                     | SEP225 |
| WDYPEGTPNGGSTLLPSAPPPASAGLK                          | SEP365 |
| PRPGTAEKQGGGR                                        | SEP334 |
| MSYCFDR                                              | SEP259 |

|                                |        |
|--------------------------------|--------|
| IIDKNGIHDLDNISFPKQGS           | SEP255 |
| KYTLPPGVDPTKVSSSLSPGTLTVEAPMPK | SEP285 |
| AGAVLYTR                       | SEP257 |
| AGDFLNLR                       | SEP70  |
| NILDELKKEYQEIENLDK             | SEP215 |
| IESEGGGEGWGR                   | SEP175 |
| APARTPRAPAPAR                  | SEP335 |
| GGEIQPVSMKVGDKVLLPEHGGTK       | SEP261 |
| LGAGAVGSQTR                    | SEP289 |
| RAGPGAGRLRAAALDPTR             | SEP224 |
| NLRAMSEFWKEINWNIPLLSWQPPK      | SEP203 |
| FINYVK                         | SEP275 |
| SFQLKGDGVFVLKSGR               | SEP196 |
| RNLADCLR                       | SEP255 |
| QLEDGGT LSDYNIQKESTLHLVLR      | SEP210 |
| CQDILEAGKRDGVSLLLPR            | SEP362 |
| QVSGGGWPPAR                    | SEP287 |
| SPGNCLIGK                      | SEP319 |
| LLAENLPIDFLNIRKIPN             | SEP180 |
| SGHLSQTPRSPEALLR               | SEP303 |
| APERQSGHGDQRARNLRGRRGLEAGSAR   | SEP263 |
| HEERQDEHGYISR                  | SEP285 |
| QSKTPSQKKK                     | SEP135 |
| GPHDPRAPAR                     | SEP335 |
| VAGSPEHKSSR                    | SEP239 |
| AVAAAAAAPDPGGR                 | SEP299 |
| ITRVKIHQHLALGALR               | SEP119 |
| NQRGDAAAGAGPR                  | SEP319 |
| ATPPGGTGHEGLSGGAADVASGVGSGRHR  | SEP291 |
| AMSQRNLNAK                     | SEP264 |
| AAACGAAGAGDAR                  | SEP287 |
| YTDRDFYFASIR                   | SEP272 |
| LRAAALDPTRR                    | SEP224 |
| TAQTAGRAAWR                    | SEP228 |
| PGQGNSRSSRSIRSPEGR             | SEP157 |
| QVLITNK                        | SEP350 |
| SRLQLRDSEAKLEGLR               | SEP282 |
| QQQNSNIFFLADR                  | SEP215 |
| RVTIMPKDIQLARR                 | SEP254 |
| AGAPAVGLLLNER                  | SEP289 |
| DALKVAGRQTDLL                  | SEP192 |
| VTIMPK                         | SEP254 |
| IMADIRAQYDDLAKG                | SEP286 |

|                                          |        |
|------------------------------------------|--------|
| TLSDYNIQK                                | SEP210 |
| MGSQHLPLR                                | SEP38  |
| FYALIFLHK                                | SEP317 |
| MGETDGAGR                                | SEP318 |
| ESTLHLVLR                                | SEP268 |
| ESTLHLVLR                                | SEP210 |
| TITLEVEPSDTIENVK                         | SEP210 |
| RVTIMPKDIQLAR                            | SEP254 |
| LVTSWDGQNPPR                             | SEP336 |
| TGGLRKMHPLR                              | SEP354 |
| PAPRAPPELAPGPPAAADARR                    | SEP322 |
| CLSMSTAACQTSSIATR                        | SEP294 |
| IEDCLAPLCPVVGGRGGCALSR                   | SEP316 |
| ERAVELLR                                 | SEP255 |
| GGSLPKVEAK                               | SEP275 |
| ELDDHVTNLHK                              | SEP259 |
| MRAGVVCVSQAQKDELILEGNDIELVSNAAAIQQATTVK  | SEP277 |
| TAAAAAAGTITRPRATANCCECTGRGPGSGGGGGSRVAVK | SEP297 |
| ATATRQEDRSPEGGWR                         | SEP61  |
| VTIMPKDIQLAR                             | SEP254 |
| MYLLFAAPSLNLQSK                          | SEP67  |
| ATANCCECTGR                              | SEP297 |
| IQDEEGIPPDQQRLIFAGK                      | SEP210 |
| SPGNCLIGKTFLTGGAPEAARR                   | SEP319 |
| TGAGILLLR                                | SEP79  |
| TEMLSESK                                 | SEP215 |
| RAPQTSVPASGEEAGKKDAASGEHPGSK             | SEP289 |
| YSVNQGINR                                | SEP355 |
| KSMSATQQGAMAGAVR                         | SEP38  |
| RSEAAPRNRGGSEASPATLQTGPPPR               | SEP320 |
| RVEDEVNSGVGQDGSLLSSPFLK                  | SEP71  |
| QLRYTDRDFYFASIRR                         | SEP272 |
| IVVDELSNLKK                              | SEP215 |
| GAEDEAAWRSWRGGGR                         | SEP299 |
| MITETSQADCAVLIVAAGVGEFEAGISK             | SEP265 |
| LLLLSIAPGDGSSEK                          | SEP132 |
| ESEIHK                                   | SEP53  |
| VSSLSPEGTLTVEAPMPK                       | SEP285 |
| KSSLVTSK                                 | SEP252 |
| QRAPCLPR                                 | SEP333 |
| AAACGAAGAGDARAEEQPGLGPGAAGR              | SEP287 |
| TPRETAGAER                               | SEP224 |
| PAFVNENIPDITKPK                          | SEP65  |

|                                          |        |
|------------------------------------------|--------|
| LGKAGAPAVGLLLANER                        | SEP289 |
| MAPLGLKDPLSSWLTPVAGK                     | SEP77  |
| SSRTAAVELVAGGVCRSPSQEN                   | SEP316 |
| QIIQGAIK                                 | SEP158 |
| APVPEPGLDLSLSPRPDSPQPR                   | SEP287 |
| KILEMELIQE                               | SEP229 |
| TAFDEAIAELDTLSEESYKDSMLIMQLLR            | SEP266 |
| EGAAVHGQQASGGPR                          | SEP296 |
| EYQEIENLDK                               | SEP215 |
| NKYEDEINKR                               | SEP274 |
| EDLSSKIKEQKIVVDELSNLKKNRKVYRQQNSNIFFLADR | SEP215 |
| HCSDGTQGTSQRGSLSR                        | SEP136 |
| QSPSGEGDPPR                              | SEP301 |
| AAAADGAGAEGAGGAEGQNR                     | SEP319 |
| LGAEVRLGSLSAIVDPRSR                      | SEP297 |
| KEGILNALETMGSSF                          | SEP41  |
| GGQLHAAGGAGR                             | SEP298 |
| EGAAVHGQQASGGPRR                         | SEP296 |
| AGPGAGRRLR                               | SEP224 |
| MTNQEAIQDLWQWR                           | SEP275 |

---

## Spectra of synthetic and PATS detected microprotein peptides

Spectrum in blue is the synthetic peptide and the one in red is from experimental MS/MS.

### 1. CQDILEAGKR

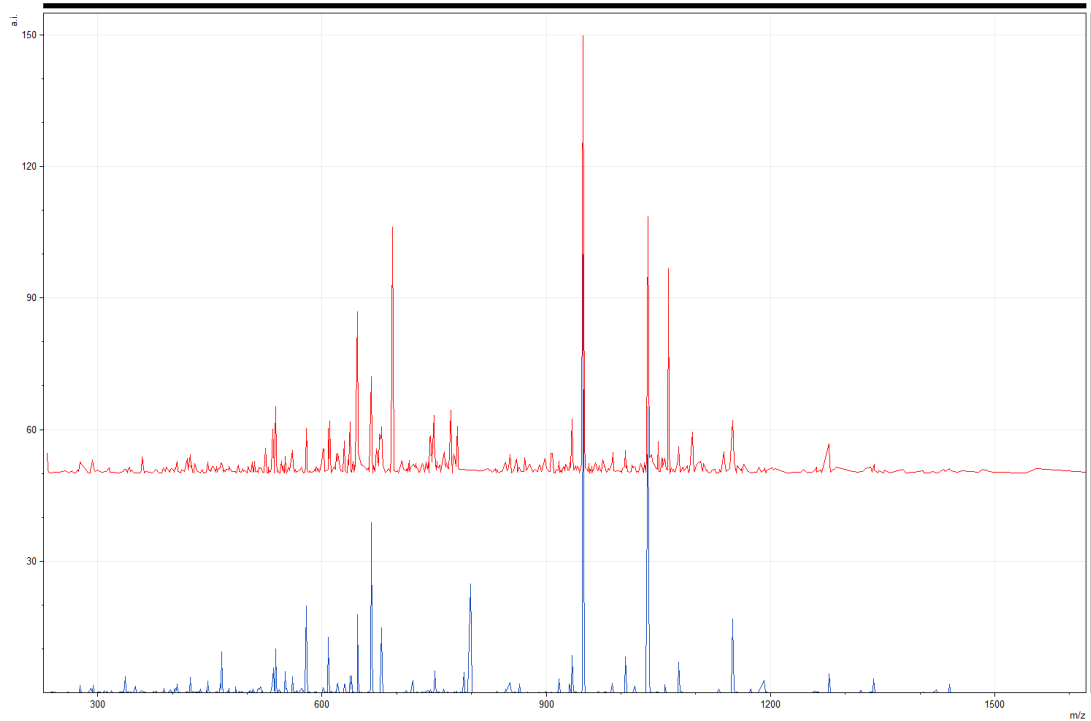

### 2. DGYELSPTAAANFTR

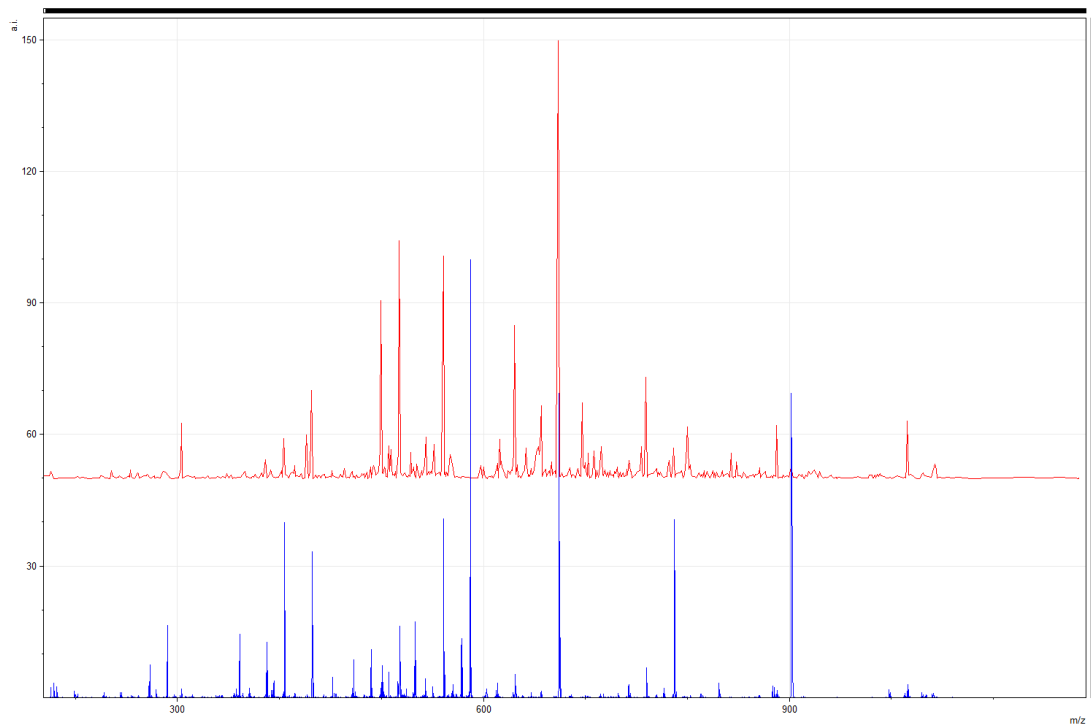

### 3. EFLDGIYVSEK

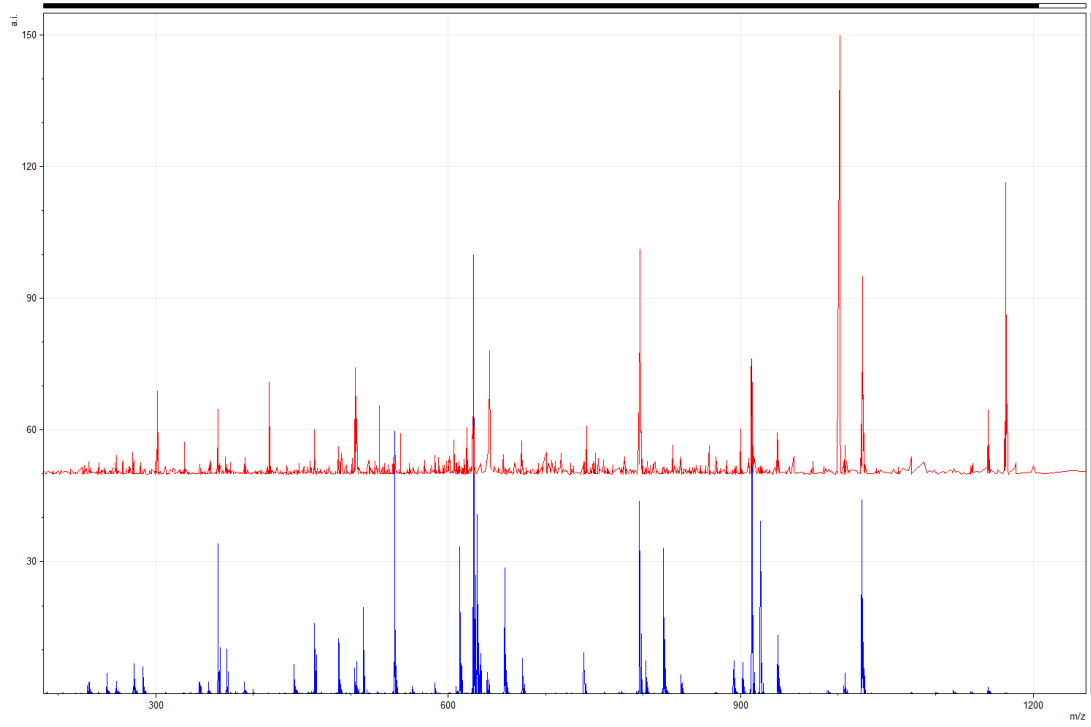

### 4. GAWGGGQLATAGSGPGQR

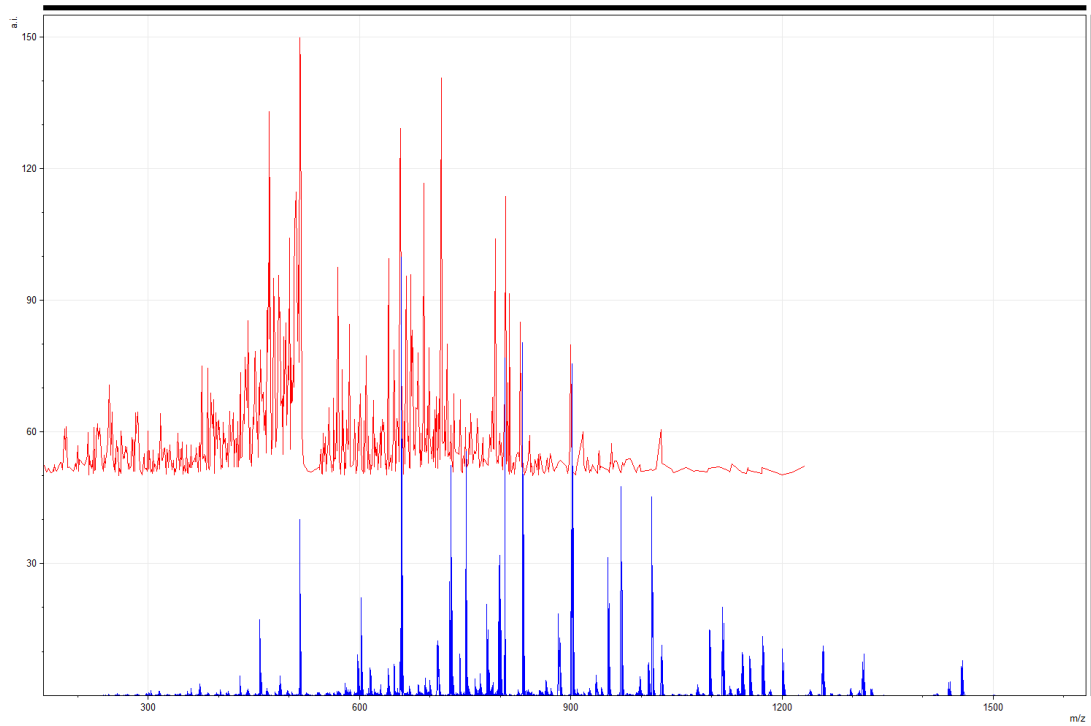

### 5. GLVFLNGK

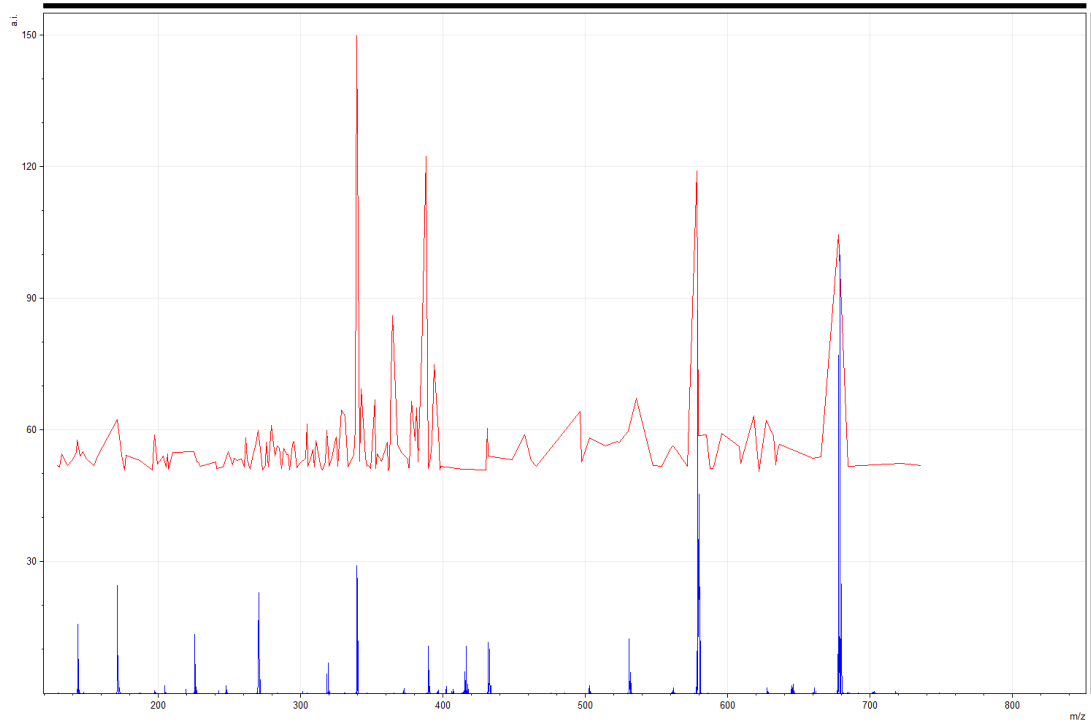

### 6. IVVDELSNLK

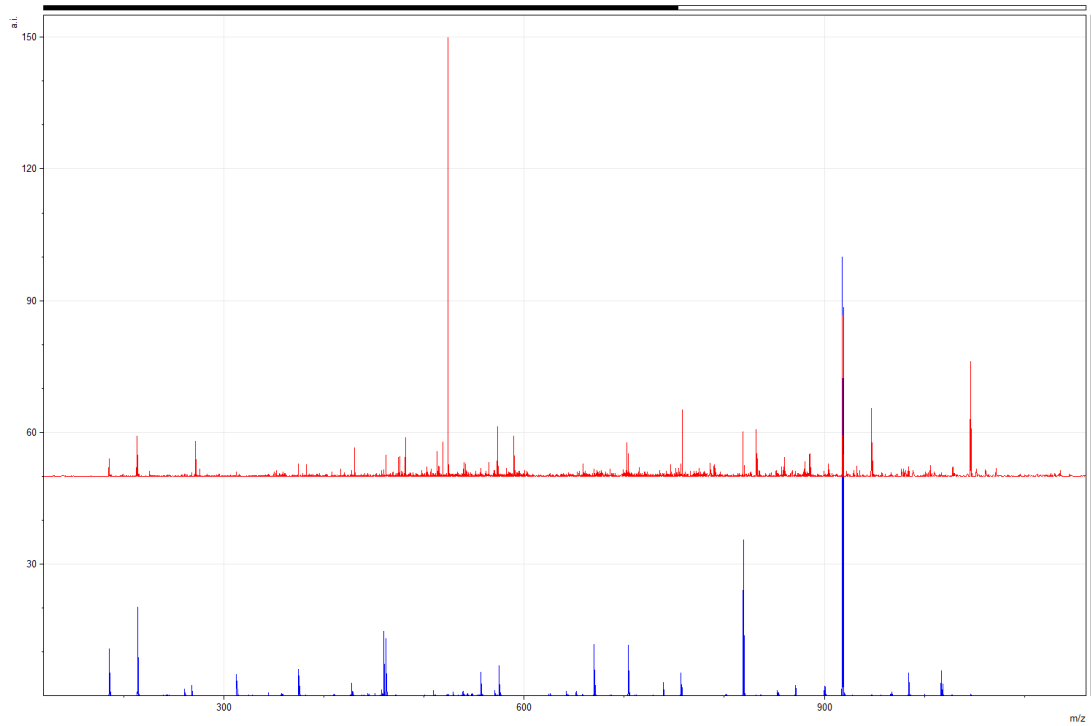



## 7. QQQNSNIFFLADR

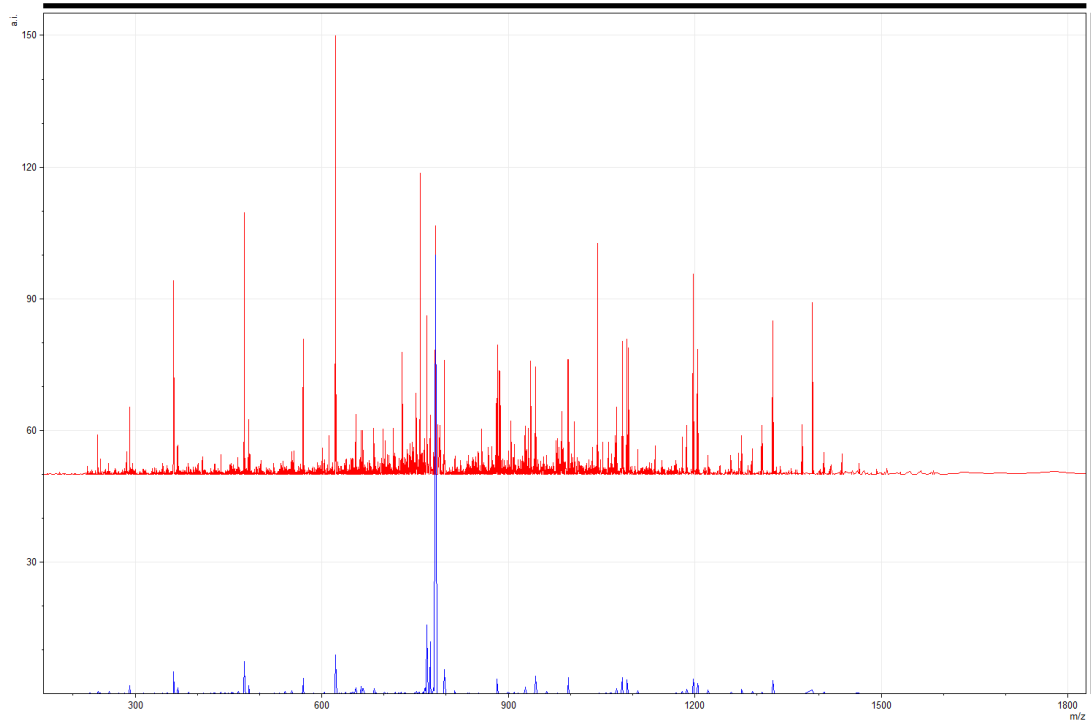

## 8. TEMLSESK

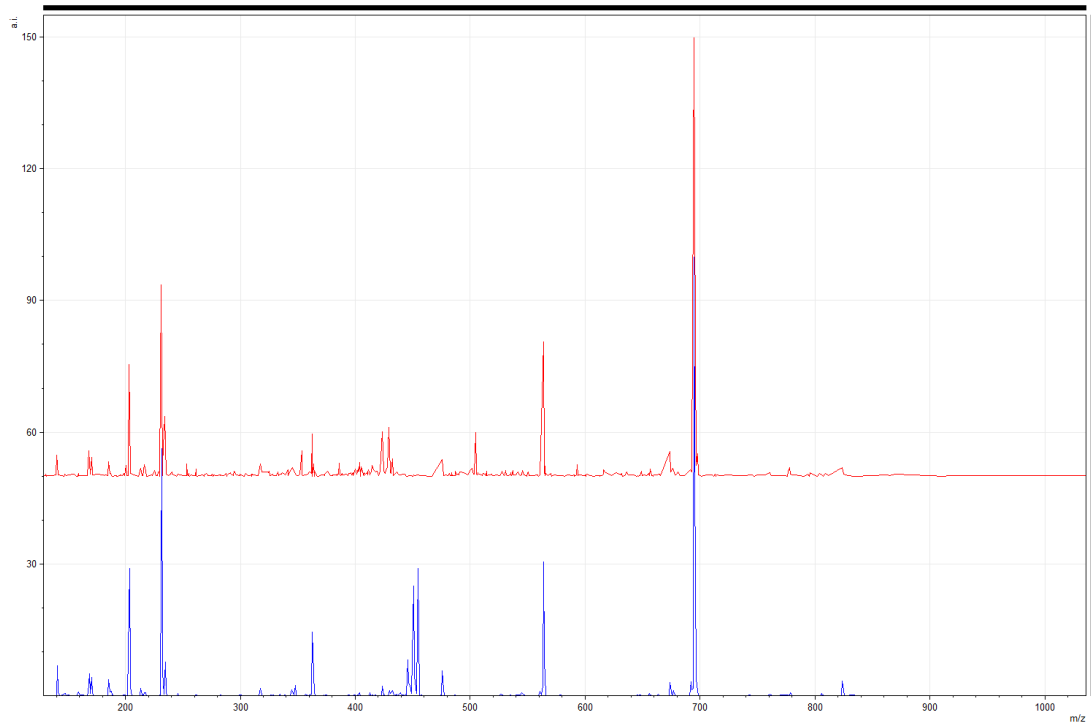

9. RGAEDEAAWRSWR

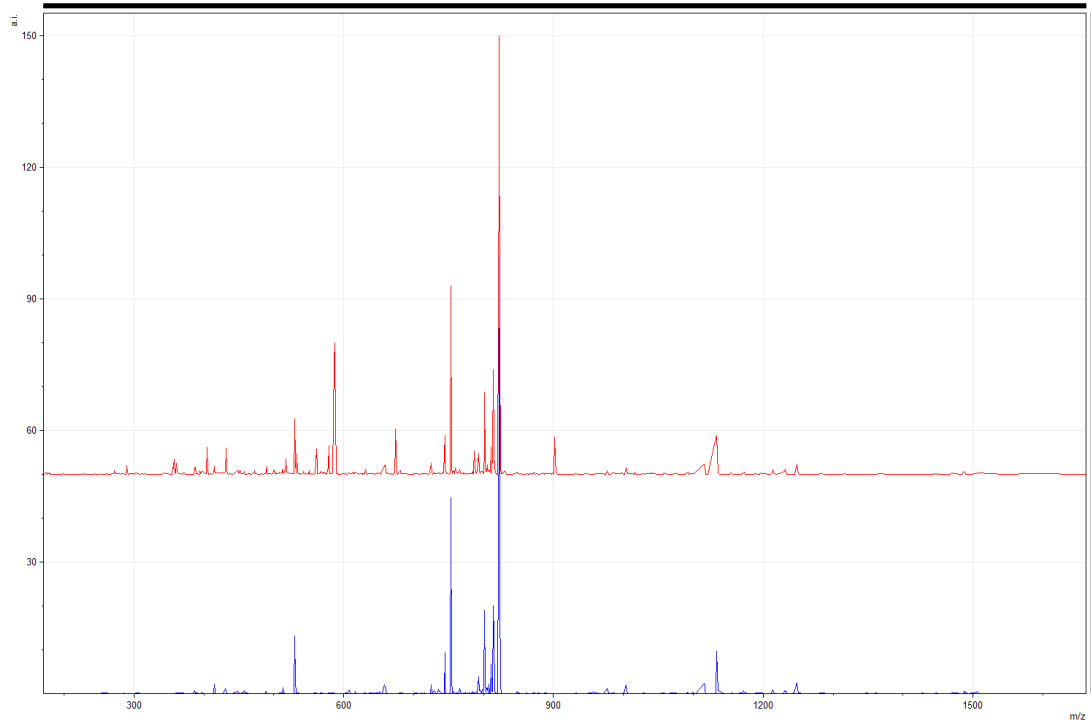

10. SSPVFQIPK

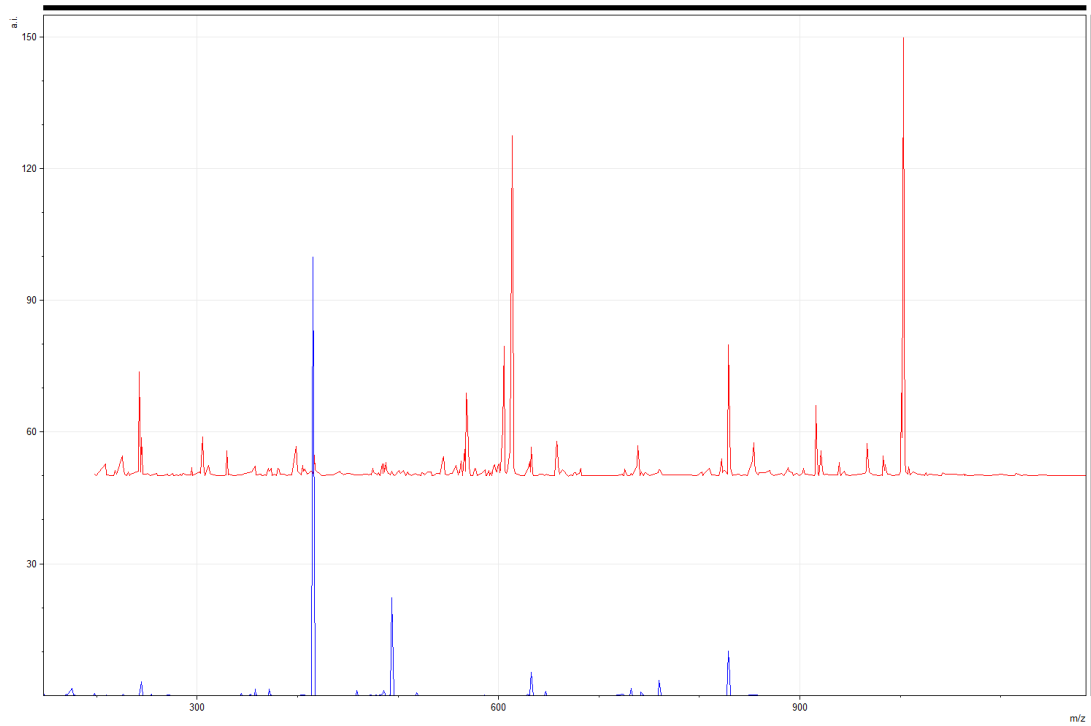

## 11. YTDRDFYFASIR

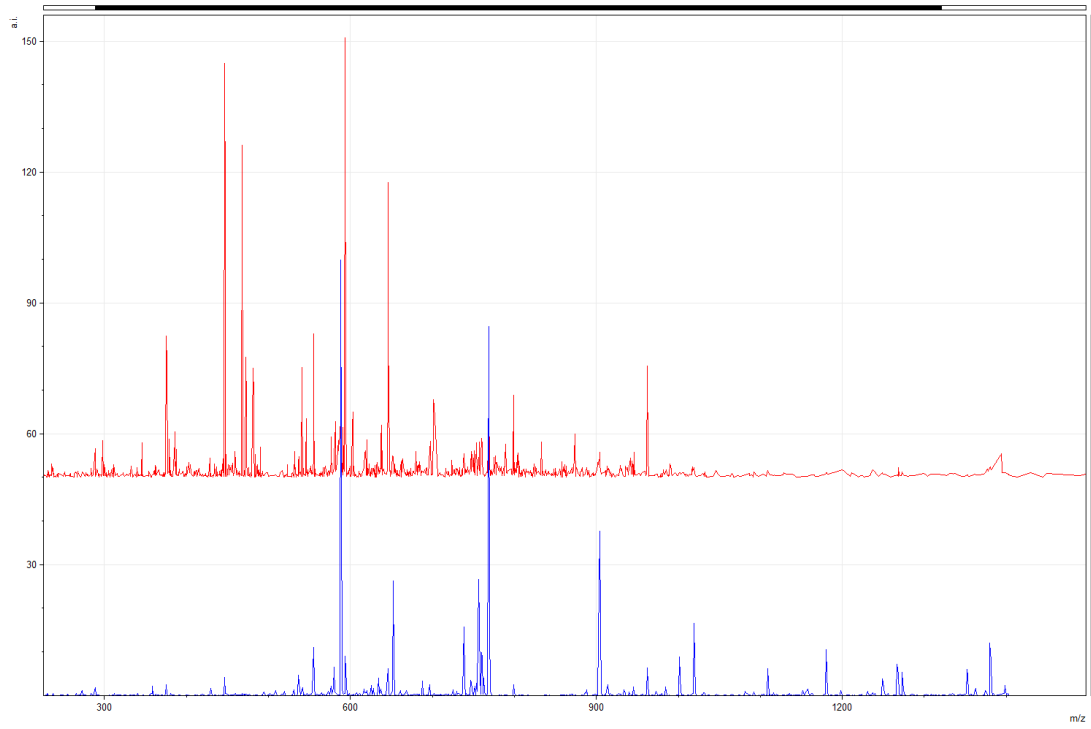

## 12. NILDELKK

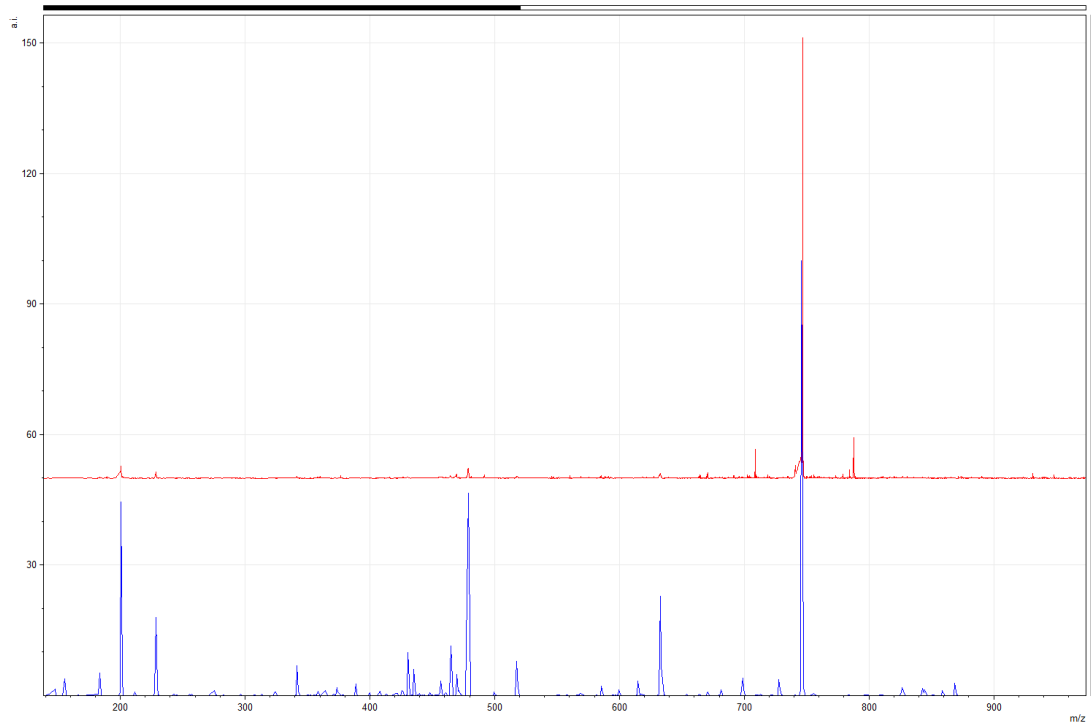

13. NDDIPEQDSLGLSNLQK

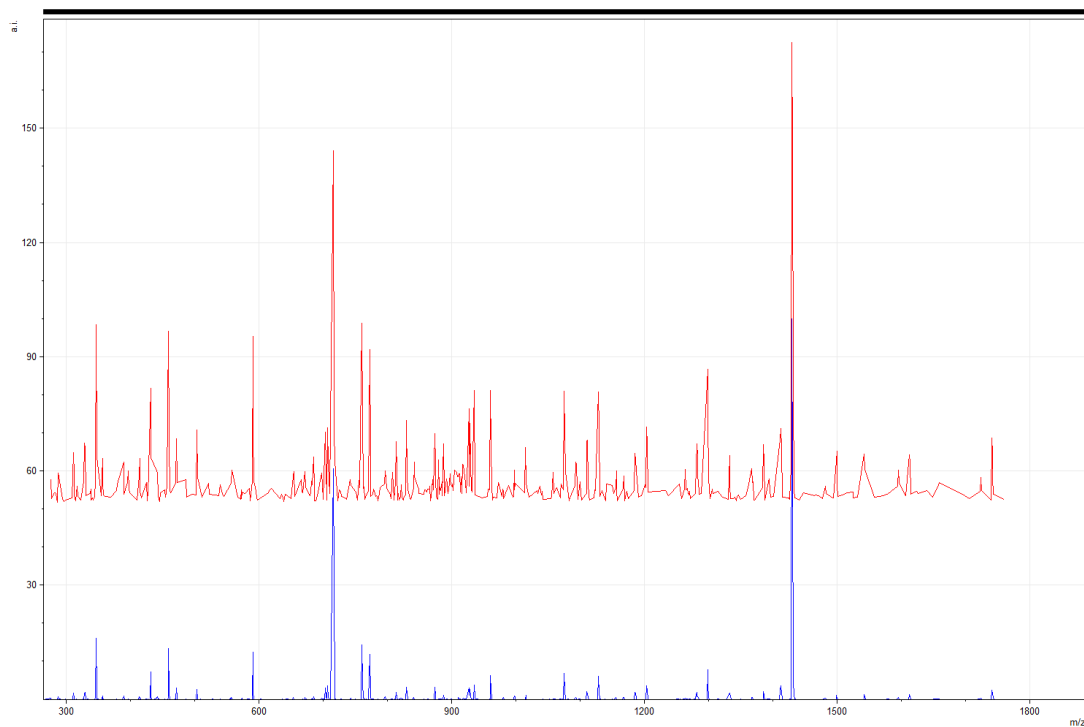

14. MTNQEAIQDLWQWRK

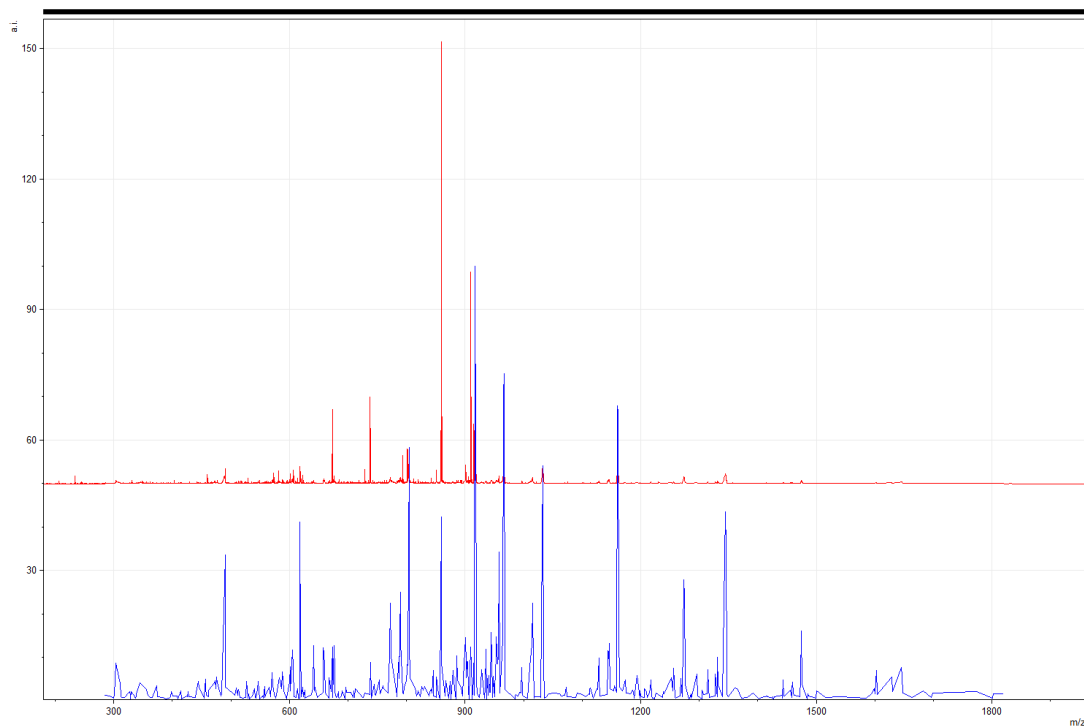

15. IQDEEGIPPDQQR

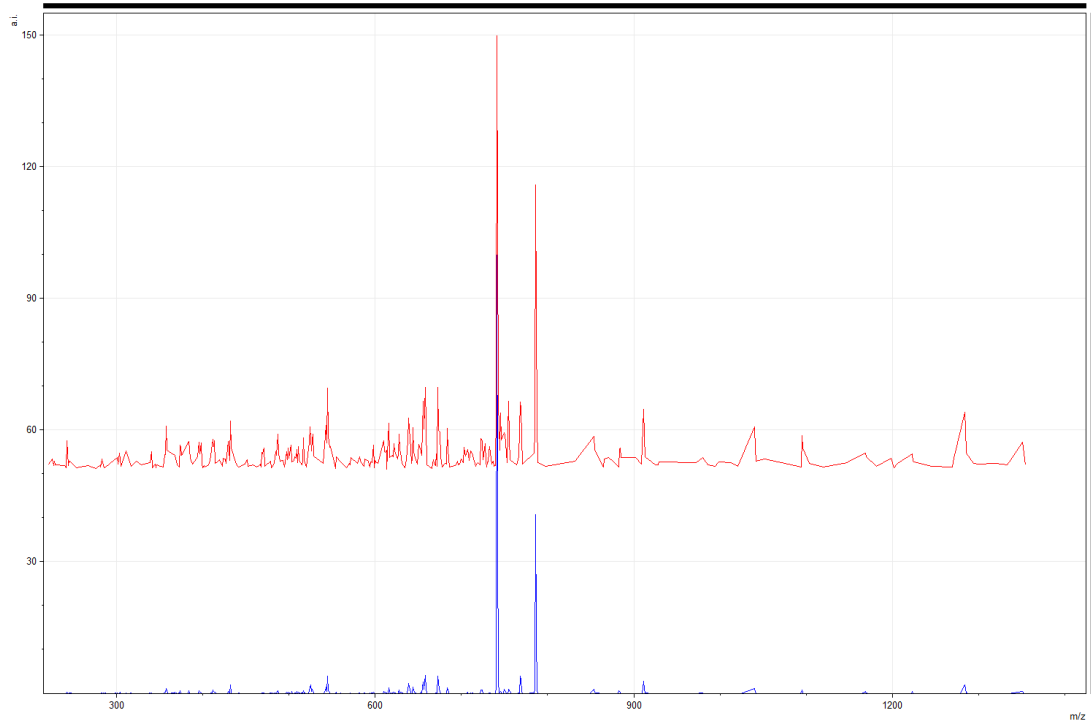

16. HPQEPIAGGGGER

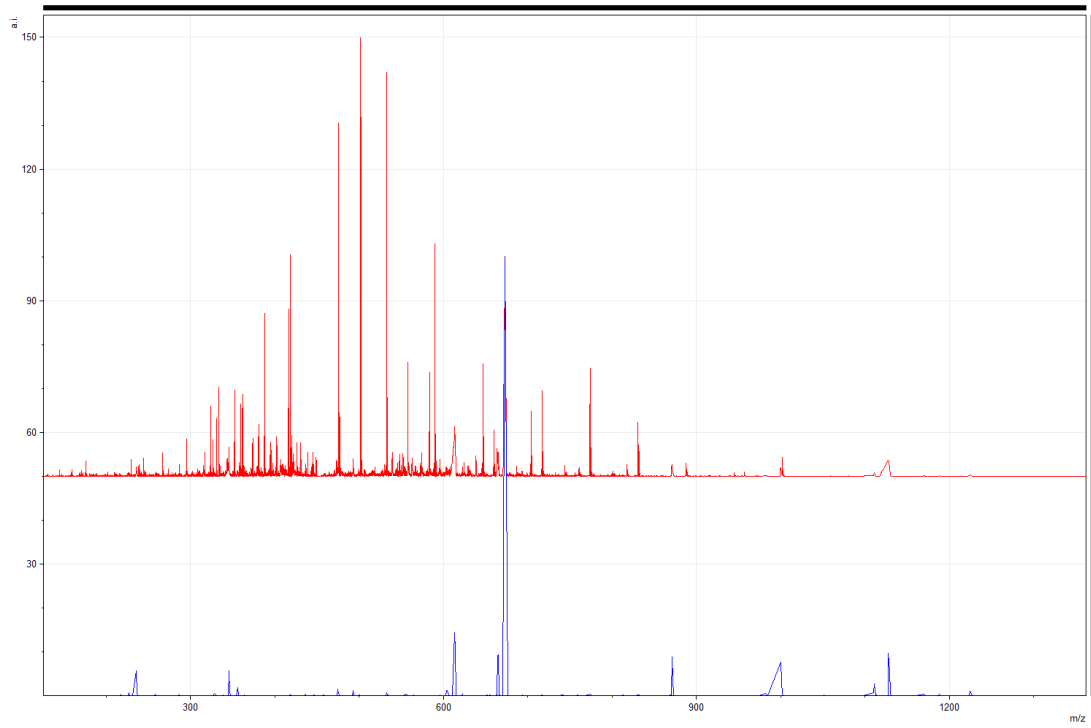

17. GTRPEDSSVLIPTDNSTPHK

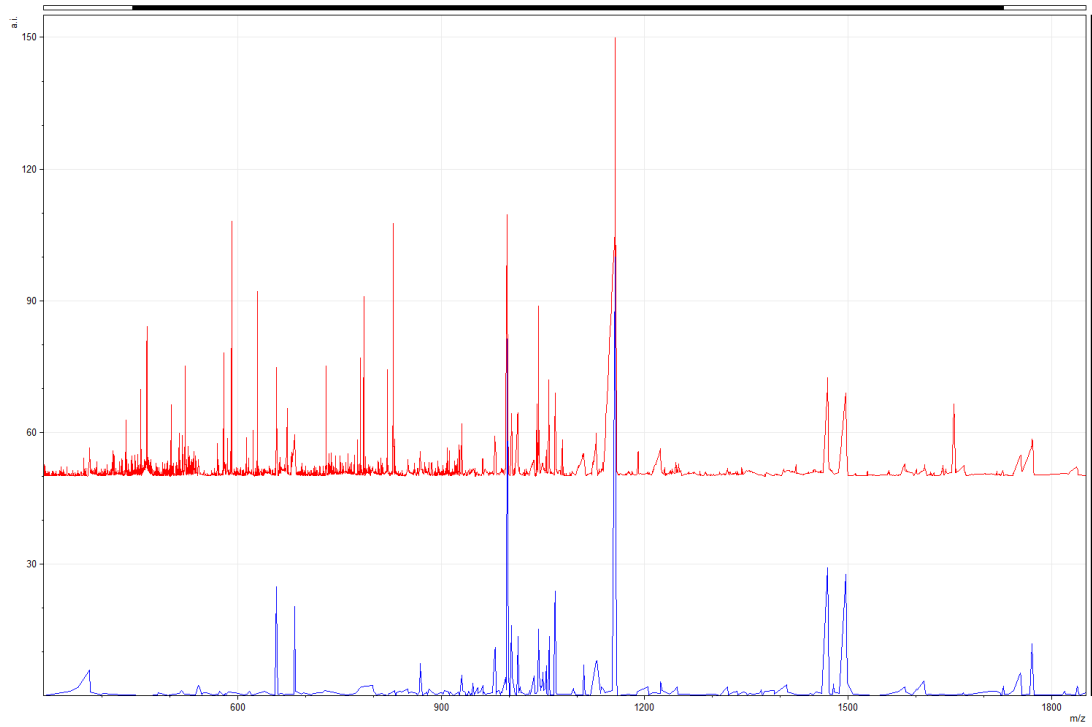

18. EYQEIENLDK

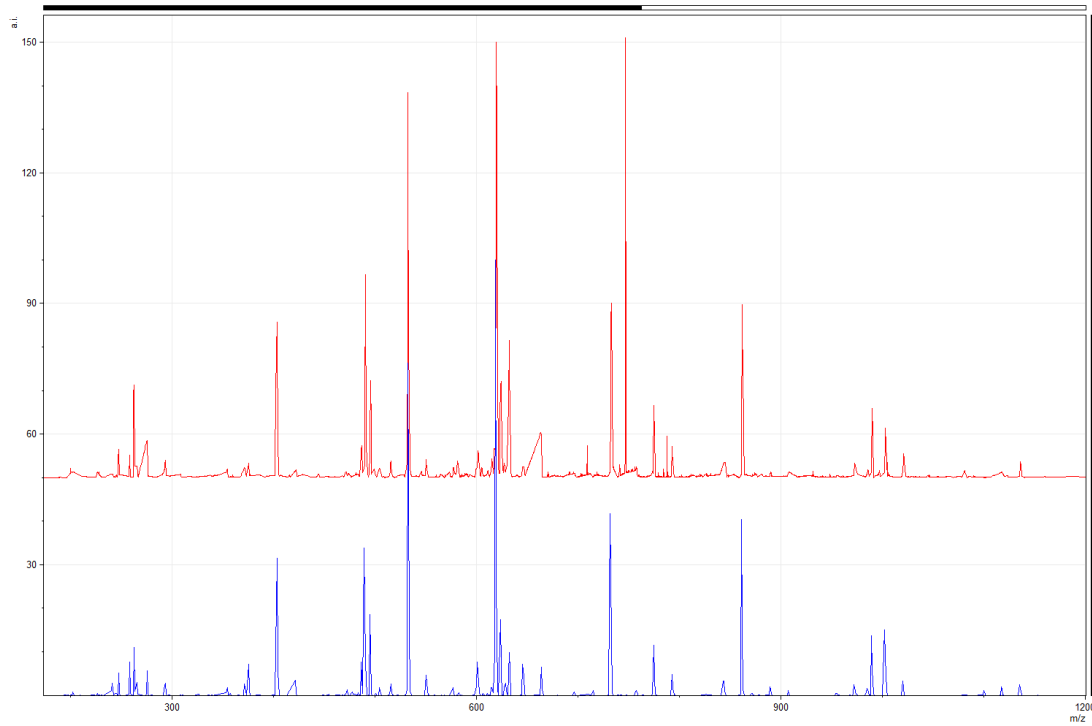

## Reference

1. Hein, M. Y.; Hubner, N. C.; Poser, I.; Cox, J.; Nagaraj, N.; Toyoda, Y.; Gak, I. A.; Weisswange, I.; Mansfeld, J.; Buchholz, F.; Hyman, A. A.; Mann, M., *Cell* **2015**, *163* (3), 712-23.
